# Supplementary material
Source: PubMed Central journal article supplement (PMC9360235)
Supplement: ajcr0012-3223-f11.pdf [file ajcr0012-3223-f11.pdf]

## MIR133A regulate SOX9 in colorectal cancer

**Table S1.** Primer sequences used for MIR133A knock-in, qRT-PCR, luciferase assay and Taq-Man analysis in this study

| Applications     | Primers*     | Primer sequence (5'→3')                                      |
|------------------|--------------|--------------------------------------------------------------|
| Knock-In         | MIR133A1-F   | CACGGATCCCTAGCAGCACTACAATGC                                  |
|                  | MIR133A1-R   | CCGAAGCTTGTCCCGTAGTAATCAATGCATA                              |
|                  | MIR133A2-F   | TATGGATCCTCCGACGTCGCTGTTC                                    |
|                  | MIR133A2-R   | TATAAGCTTCACGGCTGCGGGACCT                                    |
| qRT-PCR          | SOX9-QF1     | CGAAGATGGCCGAGATGATCC                                        |
|                  | SOX9-QR1     | GGATAGGTCATGTTTGTGTCTTGG                                     |
|                  | GAPDH-F      | CAATGACCCCTTCATTGACC                                         |
|                  | GAPDH-R      | GACAAAGCTTCCCGTTCTCAG                                        |
| Luciferase assay | SOX9-WF      | CGACGAGCTCCTCACCTACATGAACC                                   |
|                  | SOX9-WR      | GCTGCTCGAGGTTGCCTTTAGCTTAAATGTC                              |
|                  | SOX9-MF      | CCGAAGAAAGAGACCAGAATTCCTTTGG                                 |
|                  | SOX9-MR      | CCAAAGGAATTCTGGTCTCTTTCTTCGG                                 |
| Taq-Man analysis | Hsa-mir-133A | ID: PM10413 (Applied Biosystems)                             |
|                  | RNU48        | GATGACCCAGGTAAGTCTGAGTGTGTCGC<br>TGATGCCATCACCGCAGCGCTCTGACC |

\*QF: quantitative forward primer; QR: quantitative reverse primer; WF: forward primer for wild-type constructs; WR: reverse primer for wild-type constructs; MF: forward primer for mutate-type constructs; MR: reverse primer for mutate-type constructs.

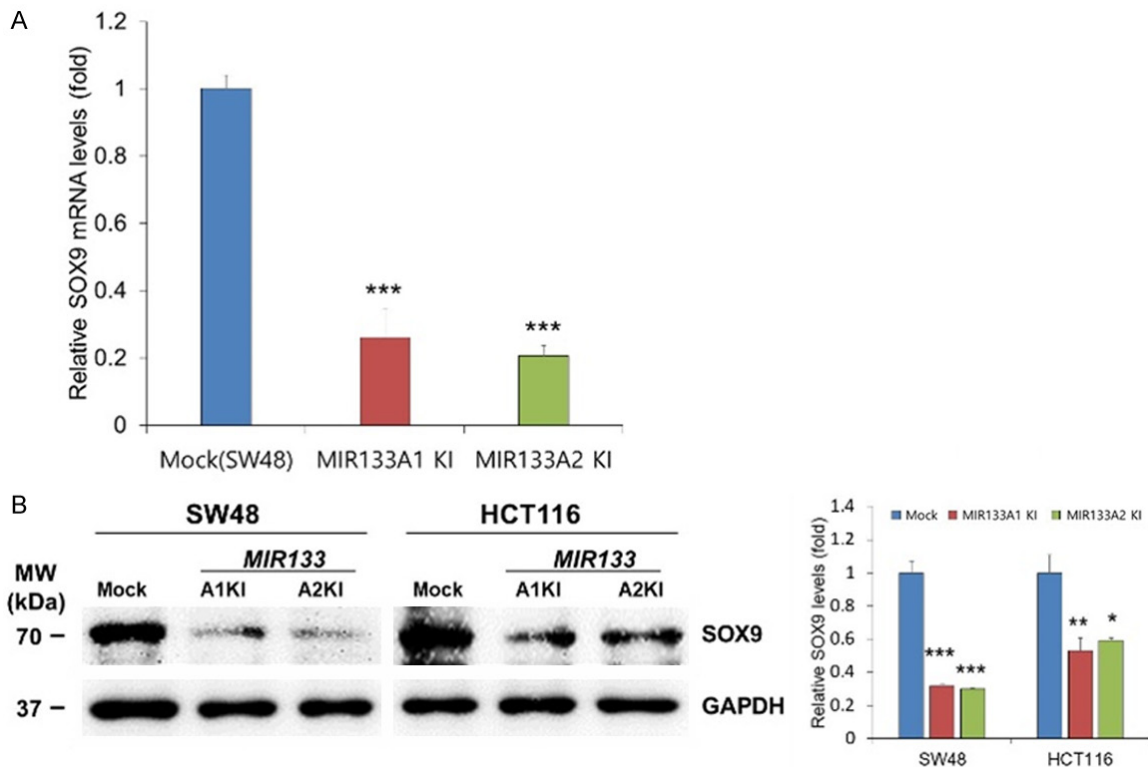

**Figure S1.** SOX9 mRNA and protein levels and MIR133A1 and A2 KI cell lines. A. qRT-PCR analysis of SOX9 mRNA expression in MIR133A1 and A2 KI SW48 cells relative to mock cells. B. Western blot analysis of SOX9 in MIR133A1 and A2 KI SW48 and HCT116 cells. Differences were considered statistically significant \* $P < 0.05$ , \*\* $P < 0.01$ , \*\*\* $P < 0.001$  compared with control.

## MIR133A regulate SOX9 in colorectal cancer

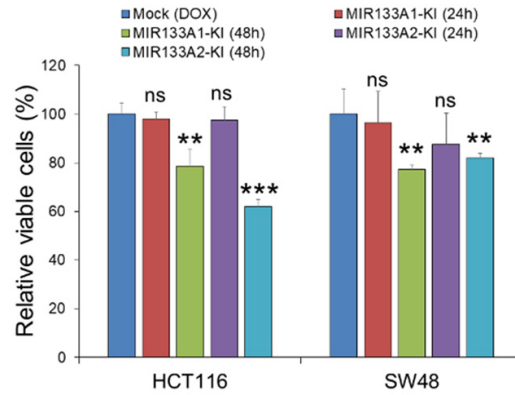

**Figure S2.** Cell proliferation in MIR133A1 and A2 KI cell lines. MTT assays of mock and MIR133A1 and A2. Representative data from at least three independent experiments are shown. Each bar represents mean fold alteration above or below control ( $\pm$  SD). Differences were considered statistically significant \*\* $P < 0.01$ , \*\*\* $P < 0.001$  compared with control (ns = not significant).
