# Supplementary material
Source: PubMed Central journal article supplement (PMC9360235)
Supplement: ajcr0012-3223-f12.pdf [file ajcr0012-3223-f12.pdf]

|    | Gene<br>Symbol | Fold change                          |                                 | p-value                        |                                | transcript_id | Description                                          |
|----|----------------|--------------------------------------|---------------------------------|--------------------------------|--------------------------------|---------------|------------------------------------------------------|
|    |                | SW48-<br>KI133-A1<br>/SW48-<br>cells | SW48-<br>KI133-<br>A2<br>/SW48- | SW48-<br>KI133-<br>A1<br>/SW48 | SW48-<br>KI133-<br>A2<br>/SW48 |               |                                                      |
| 1  | ABHD16A        | 0.691                                | 0.639                           | 0.032                          | 0.023                          | NM_001177515  | abhydrolase domain containing 16A                    |
| 2  | ABHD17C        | 0.795                                | 0.790                           | 0.012                          | 0.033                          | NM_021214     | abhydrolase domain containing 17C                    |
| 3  | ACAD9          | 0.752                                | 0.810                           | 0.014                          | 0.054                          | NM_014049     | acyl-CoA dehydrogenase family member 9               |
| 4  | ACADVL         | 0.795                                | 0.831                           | 0.045                          | 0.063                          | NM_001270447  | acyl-CoA dehydrogenase, very long chain              |
| 5  | ACAT2          | 0.594                                | 0.625                           | 0.008                          | 0.008                          | NM_005891     | acetyl-CoA acetyltransferase 2                       |
| 6  | ACBD6          | 0.727                                | 0.683                           | 0.002                          | 0.004                          | NM_032360     | acyl-CoA binding domain containing 6                 |
| 7  | ACOT7          | 0.655                                | 0.605                           | 0.024                          | 0.001                          | NM_007274     | acyl-CoA thioesterase 7                              |
| 8  | ACTB           | 0.737                                | 0.693                           | 0.021                          | 0.013                          | NM_001101     | actin, beta                                          |
| 9  | ADAM15         | 0.786                                | 0.735                           | 0.047                          | 0.038                          | NM_001261465  | ADAM metallopeptidase domain 15                      |
| 10 | ADPRHL2        | 0.724                                | 0.771                           | 0.017                          | 0.081                          | NM_017825     | ADP-ribosylhydrolase like 2                          |
| 11 | AGPAT2         | 0.648                                | 0.582                           | 0.006                          | 0.007                          | NM_006412     | 1-acylglycerol-3-phosphate O-acyltransferase 2       |
| 12 | AHSA1          | 0.776                                | 0.789                           | 0.014                          | 0.010                          | NM_012111     | activator of Hsp90 ATPase activity 1                 |
| 13 | AIF1L          | 0.637                                | 0.634                           | 0.001                          | 0.006                          | NR_033701     | allograft inflammatory factor 1 like                 |
| 14 | AIFM2          | 0.795                                | 0.750                           | 0.015                          | 0.028                          | NM_032797     | apoptosis inducing factor, mitochondria associated 2 |
| 15 | AKIRIN2        | 0.473                                | 0.441                           | 0.008                          | 0.014                          | NM_018064     | akirin 2                                             |
| 16 | ALAS1          | 0.758                                | 0.827                           | 0.009                          | 0.124                          | NM_001304443  | 5'-aminolevulinate synthase 1                        |
| 17 | ALDH1B1        | 0.684                                | 0.699                           | 0.032                          | 0.041                          | NM_000692     | aldehyde dehydrogenase 1 family member B1            |
| 18 | ALDH3A1        | 0.628                                | 0.443                           | 0.004                          | 0.002                          | NM_000691     | aldehyde dehydrogenase 3 family member A1            |
| 19 | ALYREF         | 0.702                                | 0.673                           | 0.019                          | 0.068                          | NM_005782     | Aly/REF export factor                                |
| 20 | ANKRD39        | 0.787                                | 0.710                           | 0.000                          | 0.006                          | NM_016466     | ankyrin repeat domain 39                             |
| 21 | ANXA1          | 0.709                                | 0.551                           | 0.018                          | 0.008                          | NM_000700     | annexin A1                                           |
| 22 | ANXA3          | 0.517                                | 0.476                           | 0.005                          | 0.003                          | NM_005139     | annexin A3                                           |
| 23 | AP1S3          | 0.796                                | 0.750                           | 0.042                          | 0.001                          | NM_001039569  | adaptor related protein complex 1 sigma 3 subunit    |
| 24 | AP2S1          | 0.725                                | 0.613                           | 0.011                          | 0.024                          | NM_001301076  | adaptor related protein complex 2 sigma 1 subunit    |

|    |          |       |       |       |       |              |                                                                                |
|----|----------|-------|-------|-------|-------|--------------|--------------------------------------------------------------------------------|
| 25 | APEH     | 0.701 | 0.667 | 0.026 | 0.023 | NM_001640    | acylaminoacyl-peptide hydrolase                                                |
| 26 | APOBEC3C | 0.335 | 0.381 | 0.002 | 0.001 | NM_014508    | apolipoprotein B mRNA editing enzyme catalytic subunit 3C                      |
| 27 | APOC1    | 0.492 | 0.438 | 0.033 | 0.017 | NM_001645    | apolipoprotein C1                                                              |
| 28 | ARF5     | 0.726 | 0.711 | 0.018 | 0.012 | NM_001662    | ADP ribosylation factor 5                                                      |
| 29 | ARGLU1   | 0.737 | 0.787 | 0.027 | 0.061 | NM_018011    | arginine and glutamate rich 1                                                  |
| 30 | ARHGEF16 | 0.669 | 0.686 | 0.048 | 0.048 | NM_014448    | Rho guanine nucleotide exchange factor 16                                      |
| 31 | ARL4C    | 0.318 | 0.380 | 0.001 | 0.002 | NM_001282431 | ADP ribosylation factor like GTPase 4C                                         |
| 32 | ARPC1B   | 0.711 | 0.742 | 0.017 | 0.024 | NM_005720    | actin related protein 2/3 complex subunit 1B                                   |
| 33 | ARPC4    | 0.676 | 0.668 | 0.015 | 0.015 | NM_001024960 | actin related protein 2/3 complex subunit 4                                    |
| 34 | ARPC5    | 0.782 | 0.759 | 0.046 | 0.087 | NM_005717    | actin related protein 2/3 complex subunit 5                                    |
| 35 | ARPC5L   | 0.609 | 0.637 | 0.021 | 0.027 | NM_030978    | actin related protein 2/3 complex subunit 5-like                               |
| 36 | ARRDC1   | 0.767 | 0.754 | 0.001 | 0.005 | NM_152285    | arrestin domain containing 1                                                   |
| 37 | ASS1     | 0.355 | 0.374 | 0.013 | 0.011 | NM_054012    | argininosuccinate synthase 1                                                   |
| 38 | ATAD3B   | 0.679 | 0.763 | 0.038 | 0.077 | NM_031921    | ATPase family, AAA domain containing 3B                                        |
| 39 | ATL2     | 0.731 | 0.627 | 0.029 | 0.014 | NM_001308076 | atlastin GTPase 2                                                              |
| 40 | ATP5E    | 0.743 | 0.607 | 0.020 | 0.079 | NM_006886    | ATP synthase, H+ transporting, mitochondrial F1 complex, epsilon subunit       |
| 41 | ATP5G3   | 0.738 | 0.684 | 0.009 | 0.011 | NM_001689    | ATP synthase, H+ transporting, mitochondrial Fo complex subunit C3 (subunit 9) |
| 42 | ATP5I    | 0.764 | 0.588 | 0.049 | 0.070 | NM_007100    | ATP synthase, H+ transporting, mitochondrial Fo complex subunit E              |
| 43 | ATP5J2   | 0.715 | 0.647 | 0.038 | 0.071 | NM_001003713 | ATP synthase, H+ transporting, mitochondrial Fo complex subunit F2             |
| 44 | ATP6V0B  | 0.721 | 0.676 | 0.047 | 0.016 | NM_001294333 | ATPase H+ transporting V0 subunit b                                            |
| 45 | B4GALT3  | 0.738 | 0.678 | 0.001 | 0.000 | NM_003779    | beta-1,4-galactosyltransferase 3                                               |
| 46 | BAX      | 0.586 | 0.500 | 0.049 | 0.015 | NM_004324    | BCL2-associated X protein                                                      |
| 47 | BCAR1    | 0.623 | 0.640 | 0.020 | 0.027 | NM_001170717 | BCAR1, Cas family scaffolding protein                                          |
| 48 | BCCIP    | 0.748 | 0.790 | 0.038 | 0.055 | NM_078469    | BRCA2 and CDKN1A interacting protein                                           |
| 49 | BCL2L12  | 0.714 | 0.771 | 0.004 | 0.033 | NR_104203    | BCL2 like 12                                                                   |
| 50 | BDH1     | 0.693 | 0.743 | 0.014 | 0.012 | NM_004051    | 3-hydroxybutyrate dehydrogenase, type 1                                        |
| 51 | BID      | 0.779 | 0.694 | 0.012 | 0.018 | NM_001244567 | BH3 interacting domain death agonist                                           |
| 52 | BIRC5    | 0.709 | 0.662 | 0.007 | 0.018 | NM_001168    | baculoviral IAP repeat containing 5                                            |
| 53 | BRD7     | 0.763 | 0.779 | 0.008 | 0.018 | NM_001173984 | bromodomain containing 7                                                       |

|    |          |       |       |       |       |              |                                                            |
|----|----------|-------|-------|-------|-------|--------------|------------------------------------------------------------|
| 54 | BTBD6    | 0.792 | 0.818 | 0.034 | 0.039 | NM_033271    | BTB domain containing 6                                    |
| 55 | BTG3     | 0.771 | 0.757 | 0.023 | 0.078 | NM_006806    | BTG family member 3                                        |
| 56 | BUD13    | 0.767 | 0.971 | 0.005 | 0.596 | NM_032725    | BUD13 homolog                                              |
| 57 | BYSL     | 0.786 | 0.744 | 0.014 | 0.010 | NM_004053    | bystin like                                                |
| 58 | BZW1     | 0.799 | 0.839 | 0.044 | 0.062 | NM_001207067 | basic leucine zipper and W2 domains 1                      |
| 59 | C11orf24 | 0.629 | 0.606 | 0.015 | 0.018 | NM_001300913 | chromosome 11 open reading frame 24                        |
| 60 | C11orf98 | 0.702 | 0.595 | 0.038 | 0.025 | NM_001286086 | chromosome 11 open reading frame 98                        |
| 61 | C12orf45 | 0.777 | 0.666 | 0.021 | 0.002 | NM_152318    | chromosome 12 open reading frame 45                        |
| 62 | C14orf2  | 0.784 | 0.714 | 0.036 | 0.060 | NM_004894    | chromosome 14 open reading frame 2                         |
| 63 | C17orf96 | 0.714 | 0.737 | 0.017 | 0.028 | NM_001130677 | chromosome 17 open reading frame 96                        |
| 64 | C19orf53 | 0.673 | 0.610 | 0.009 | 0.019 | NM_014047    | chromosome 19 open reading frame 53                        |
| 65 | C1QBP    | 0.785 | 0.717 | 0.025 | 0.000 | NM_001212    | complement component 1, q subcomponent binding protein     |
| 66 | C1QL1    | 0.638 | 0.603 | 0.023 | 0.020 | NM_006688    | complement component 1, q subcomponent-like 1              |
| 67 | C20orf27 | 0.747 | 0.690 | 0.017 | 0.001 | NM_001039140 | chromosome 20 open reading frame 27                        |
| 68 | C2orf47  | 0.786 | 0.843 | 0.005 | 0.008 | NM_024520    | chromosome 2 open reading frame 47                         |
| 69 | C6orf15  | 0.398 | 0.363 | 0.020 | 0.019 | NM_014070_1  | chromosome 6 open reading frame 15                         |
| 70 | C7orf26  | 0.779 | 0.910 | 0.031 | 0.106 | NM_024067    | chromosome 7 open reading frame 26                         |
| 71 | C7orf73  | 0.742 | 0.845 | 0.020 | 0.344 | NM_001130929 | chromosome 7 open reading frame 73                         |
| 72 | C9orf89  | 0.761 | 0.718 | 0.006 | 0.016 | NM_032310    | .                                                          |
| 73 | CALM1    | 0.785 | 0.729 | 0.034 | 0.011 | NM_006888    | calmodulin 1 (phosphorylase kinase, delta)                 |
| 74 | CAMK1    | 0.733 | 0.765 | 0.042 | 0.060 | NM_003656    | calcium/calmodulin dependent protein kinase I              |
| 75 | CAMK2N1  | 0.520 | 0.558 | 0.015 | 0.009 | NM_018584    | calcium/calmodulin dependent protein kinase II inhibitor 1 |
| 76 | CAPG     | 0.781 | 0.730 | 0.002 | 0.003 | NM_001256140 | capping actin protein, gelsolin like                       |
| 77 | CARS2    | 0.790 | 0.705 | 0.030 | 0.002 | NM_024537    | cysteinyl-tRNA synthetase 2, mitochondrial (putative)      |
| 78 | CBR1     | 0.686 | 0.610 | 0.008 | 0.016 | NM_001757    | carbonyl reductase 1                                       |
| 79 | CBR3     | 0.532 | 0.582 | 0.005 | 0.006 | NM_001236    | carbonyl reductase 3                                       |
| 80 | CCDC58   | 0.687 | 0.692 | 0.036 | 0.012 | NM_001017928 | coiled-coil domain containing 58                           |
| 81 | CCDC86   | 0.705 | 0.625 | 0.032 | 0.009 | NM_024098    | coiled-coil domain containing 86                           |
| 82 | CCDC94   | 0.761 | 0.854 | 0.010 | 0.068 | NM_018074    | coiled-coil domain containing 94                           |

|     |          |       |       |       |       |              |                                                                 |
|-----|----------|-------|-------|-------|-------|--------------|-----------------------------------------------------------------|
| 83  | CCNB1    | 0.747 | 0.706 | 0.031 | 0.028 | NM_031966    | cyclin B1                                                       |
| 84  | CCND2    | 0.535 | 0.591 | 0.003 | 0.005 | NM_001759    | cyclin D2                                                       |
| 85  | CCT2     | 0.779 | 0.764 | 0.021 | 0.005 | NM_006431    | chaperonin containing TCP1 subunit 2                            |
| 86  | CD24     | 0.489 | 0.597 | 0.004 | 0.011 | NR_117089    | CD24 molecule                                                   |
| 87  | CD44     | 0.625 | 0.643 | 0.002 | 0.001 | NM_001001390 | CD44 molecule (Indian blood group)                              |
| 88  | CD82     | 0.384 | 0.519 | 0.002 | 0.012 | NM_002231    | CD82 molecule                                                   |
| 89  | CD83     | 0.669 | 0.653 | 0.003 | 0.050 | NM_001251901 | CD83 molecule                                                   |
| 90  | CDC42SE1 | 0.797 | 0.832 | 0.013 | 0.158 | NM_001038707 | CDC42 small effector 1                                          |
| 91  | CDC45    | 0.713 | 0.687 | 0.038 | 0.022 | NM_003504    | cell division cycle 45                                          |
| 92  | CDCA7    | 0.590 | 0.584 | 0.002 | 0.024 | NM_031942    | cell division cycle associated 7                                |
| 93  | CDCP1    | 0.622 | 0.671 | 0.006 | 0.011 | NM_022842    | CUB domain containing protein 1                                 |
| 94  | CDH3     | 0.775 | 0.879 | 0.045 | 0.136 | NM_001793    | cadherin 3                                                      |
| 95  | CDK2AP1  | 0.726 | 0.758 | 0.011 | 0.067 | NR_073007    | cyclin-dependent kinase 2 associated protein 1                  |
| 96  | CDKN1A   | 0.470 | 0.427 | 0.004 | 0.004 | NM_001220777 | cyclin-dependent kinase inhibitor 1A                            |
| 97  | CDKN3    | 0.645 | 0.597 | 0.042 | 0.027 | NM_001130851 | cyclin-dependent kinase inhibitor 3                             |
| 98  | CDV3     | 0.800 | 0.799 | 0.023 | 0.035 | NM_001282762 | CDV3 homolog                                                    |
| 99  | CEBPB    | 0.712 | 0.613 | 0.010 | 0.001 | NM_005194    | CCAAT/enhancer binding protein beta                             |
| 100 | CEBPD    | 0.503 | 0.478 | 0.001 | 0.004 | NM_005195    | CCAAT/enhancer binding protein delta                            |
| 101 | CENPA    | 0.696 | 0.719 | 0.021 | 0.029 | NM_001809    | centromere protein A                                            |
| 102 | CENPV    | 0.560 | 0.550 | 0.027 | 0.028 | NM_181716    | centromere protein V                                            |
| 103 | CENPW    | 0.695 | 0.639 | 0.015 | 0.078 | NR_104462    | centromere protein W                                            |
| 104 | CHCHD1   | 0.693 | 0.661 | 0.001 | 0.048 | NM_203298    | coiled-coil-helix-coiled-coil-helix domain containing 1         |
| 105 | CHCHD2   | 0.725 | 0.629 | 0.007 | 0.021 | NM_016139    | coiled-coil-helix-coiled-coil-helix domain containing 2         |
| 106 | CHCHD7   | 0.767 | 0.732 | 0.002 | 0.159 | NM_001011668 | coiled-coil-helix-coiled-coil-helix domain containing 7         |
| 107 | CINP     | 0.764 | 0.607 | 0.022 | 0.009 | NM_032630    | cyclin-dependent kinase 2 interacting protein                   |
| 108 | CKS2     | 0.716 | 0.679 | 0.039 | 0.044 | NM_001827    | CDC28 protein kinase regulatory subunit 2                       |
| 109 | CLCF1    | 0.431 | 0.417 | 0.000 | 0.002 | NM_013246    | cardiotrophin-like cytokine factor 1                            |
| 110 | CLDN4    | 0.654 | 0.501 | 0.032 | 0.016 | NM_001305    | claudin 4                                                       |
| 111 | CLPP     | 0.756 | 0.716 | 0.007 | 0.006 | NM_006012    | caseinolytic mitochondrial matrix peptidase proteolytic subunit |

|     |          |       |       |       |       |              |                                                          |
|-----|----------|-------|-------|-------|-------|--------------|----------------------------------------------------------|
| 112 | CLU      | 0.535 | 0.603 | 0.009 | 0.009 | NR_045494    | clusterin                                                |
| 113 | CMC2     | 0.609 | 0.640 | 0.024 | 0.069 | NM_020188    | C-x9-C motif containing 2                                |
| 114 | CMTM7    | 0.795 | 0.683 | 0.036 | 0.041 | NM_181472    | CKLF like MARVEL transmembrane domain containing 7       |
| 115 | CNBP     | 0.793 | 0.815 | 0.033 | 0.088 | NM_001127195 | CCHC-type zinc finger nucleic acid binding protein       |
| 116 | COA4     | 0.723 | 0.551 | 0.042 | 0.017 | NM_016565    | cytochrome c oxidase assembly factor 4 homolog           |
| 117 | COA6     | 0.680 | 0.656 | 0.034 | 0.113 | NM_001206641 | cytochrome c oxidase assembly factor 6                   |
| 118 | COL17A1  | 0.509 | 0.447 | 0.015 | 0.013 | NM_000494    | collagen type XVII alpha 1                               |
| 119 | COLGALT1 | 0.798 | 0.788 | 0.048 | 0.035 | NM_024656    | collagen beta(1-O)galactosyltransferase 1                |
| 120 | COMMD4   | 0.703 | 0.636 | 0.036 | 0.007 | NM_017828    | COMM domain containing 4                                 |
| 121 | COMMD5   | 0.791 | 0.725 | 0.047 | 0.077 | NM_001081003 | COMM domain containing 5                                 |
| 122 | COPRS    | 0.723 | 0.641 | 0.032 | 0.037 | NM_018405    | coordinator of PRMT5 and differentiation stimulator      |
| 123 | COPS7B   | 0.765 | 0.818 | 0.024 | 0.017 | NM_001282951 | COP9 signalosome subunit 7B                              |
| 124 | COQ2     | 0.721 | 0.697 | 0.000 | 0.011 | NM_015697    | coenzyme Q2, polyprenyltransferase                       |
| 125 | COTL1    | 0.614 | 0.606 | 0.007 | 0.008 | NM_021149    | coactosin like F-actin binding protein 1                 |
| 126 | CRABP2   | 0.084 | 0.106 | 0.000 | 0.000 | NM_001878    | cellular retinoic acid binding protein 2                 |
| 127 | CRELD2   | 0.737 | 0.694 | 0.022 | 0.015 | NM_001284318 | cysteine rich with EGF like domains 2                    |
| 128 | CRIP2    | 0.597 | 0.705 | 0.001 | 0.006 | NR_073082    | cysteine rich protein 2                                  |
| 129 | CRISPLD2 | 0.565 | 0.569 | 0.004 | 0.001 | NM_031476    | cysteine rich secretory protein LCCL domain containing 2 |
| 130 | CSTB     | 0.737 | 0.701 | 0.005 | 0.060 | NM_000100    | cystatin B                                               |
| 131 | CSTF1    | 0.753 | 0.848 | 0.005 | 0.049 | NM_001033521 | cleavage stimulation factor subunit 1                    |
| 132 | CTSC     | 0.799 | 0.719 | 0.004 | 0.006 | NM_001814    | cathepsin C                                              |
| 133 | CTSD     | 0.698 | 0.664 | 0.034 | 0.060 | NM_001909    | cathepsin D                                              |
| 134 | CWC15    | 0.740 | 0.736 | 0.019 | 0.032 | NM_016403    | CWC15 spliceosome-associated protein                     |
| 135 | CXADR    | 0.643 | 0.667 | 0.010 | 0.000 | NM_001207063 | coxsackie virus and adenovirus receptor                  |
| 136 | CXCL16   | 0.733 | 0.733 | 0.043 | 0.031 | NM_022059    | C-X-C motif chemokine ligand 16                          |
| 137 | CXXC5    | 0.350 | 0.384 | 0.001 | 0.001 | NM_016463    | CXXC finger protein 5                                    |
| 138 | CYCS     | 0.755 | 0.717 | 0.032 | 0.033 | NM_018947    | cytochrome c, somatic                                    |
| 139 | DANCR    | 0.474 | 0.473 | 0.003 | 0.002 | NR_024031    | differentiation antagonizing non-protein coding RNA      |
| 140 | DAZAP1   | 0.751 | 0.768 | 0.020 | 0.044 | NM_170711    | DAZ associated protein 1                                 |

|     |          |       |       |       |       |              |                                                                                |
|-----|----------|-------|-------|-------|-------|--------------|--------------------------------------------------------------------------------|
| 141 | DBI      | 0.629 | 0.663 | 0.007 | 0.074 | NM_001282634 | diazepam binding inhibitor (GABA receptor modulator, acyl-CoA binding protein) |
| 142 | DCBLD2   | 0.660 | 0.702 | 0.006 | 0.006 | NM_080927    | discoidin, CUB and LCCL domain containing 2                                    |
| 143 | DCPS     | 0.780 | 0.752 | 0.043 | 0.069 | NM_014026    | decapping enzyme, scavenger                                                    |
| 144 | DCTPP1   | 0.714 | 0.635 | 0.015 | 0.001 | NM_024096    | dCTP pyrophosphatase 1                                                         |
| 145 | DCXR     | 0.670 | 0.679 | 0.016 | 0.035 | NM_001195218 | dicarbonyl/L-xylulose reductase                                                |
| 146 | DDAH2    | 0.653 | 0.707 | 0.042 | 0.089 | NM_001303008 | dimethylarginine dimethylaminohydrolase 2                                      |
| 147 | DDB2     | 0.785 | 0.912 | 0.026 | 0.162 | NM_001300734 | damage specific DNA binding protein 2                                          |
| 148 | DDR1     | 0.702 | 0.712 | 0.021 | 0.030 | NM_001297652 | discoidin domain receptor tyrosine kinase 1                                    |
| 149 | DGAT1    | 0.791 | 0.759 | 0.050 | 0.040 | NM_012079    | diacylglycerol O-acyltransferase 1                                             |
| 150 | DGKA     | 0.402 | 0.405 | 0.001 | 0.001 | NM_001345    | diacylglycerol kinase alpha                                                    |
| 151 | DHCR24   | 0.673 | 0.798 | 0.011 | 0.029 | NM_014762    | 24-dehydrocholesterol reductase                                                |
| 152 | DHCR7    | 0.674 | 0.646 | 0.006 | 0.007 | NM_001163817 | 7-dehydrocholesterol reductase                                                 |
| 153 | DHRS2    | 0.262 | 0.261 | 0.001 | 0.001 | NM_005794    | dehydrogenase/reductase (SDR family) member 2                                  |
| 154 | DMKN     | 0.728 | 0.747 | 0.032 | 0.023 | NR_033746    | dermokine                                                                      |
| 155 | DNAJB11  | 0.718 | 0.795 | 0.018 | 0.014 | NM_016306    | DnaJ heat shock protein family (Hsp40) member B11                              |
| 156 | DOHH     | 0.776 | 0.812 | 0.050 | 0.025 | NM_031304    | deoxyhypusine hydroxylase/monooxygenase                                        |
| 157 | DPH2     | 0.766 | 0.884 | 0.032 | 0.071 | NM_001384    | DPH2 homolog                                                                   |
| 158 | DRAP1    | 0.631 | 0.535 | 0.021 | 0.013 | NM_006442    | DR1 associated protein 1                                                       |
| 159 | DSC2     | 0.406 | 0.348 | 0.002 | 0.002 | NM_024422    | desmocollin 2                                                                  |
| 160 | DSP      | 0.696 | 0.708 | 0.001 | 0.062 | NM_001008844 | desmoplakin                                                                    |
| 161 | DTYMK    | 0.625 | 0.599 | 0.009 | 0.006 | NM_001165031 | deoxythymidylate kinase                                                        |
| 162 | DUS1L    | 0.796 | 0.784 | 0.024 | 0.001 | NM_022156    | dihydrouridine synthase 1 like                                                 |
| 163 | DUSP14   | 0.728 | 0.763 | 0.019 | 0.008 | NM_007026    | dual specificity phosphatase 14                                                |
| 164 | DUSP7    | 0.751 | 0.740 | 0.040 | 0.037 | NM_001947    | dual specificity phosphatase 7                                                 |
| 165 | DUT      | 0.784 | 0.655 | 0.032 | 0.031 | NM_001025249 | deoxyuridine triphosphatase                                                    |
| 166 | EBNA1BP2 | 0.747 | 0.614 | 0.039 | 0.018 | NM_001159936 | EBNA1 binding protein 2                                                        |
| 167 | EBP      | 0.698 | 0.681 | 0.030 | 0.024 | NM_006579    | emopamil binding protein (sterol isomerase)                                    |
| 168 | ECE2     | 0.729 | 0.656 | 0.004 | 0.150 | NM_014693    | endothelin converting enzyme 2                                                 |
| 169 | ECHS1    | 0.772 | 0.711 | 0.015 | 0.001 | NM_004092    | enoyl-CoA hydratase, short chain, 1, mitochondrial                             |

|     |          |       |       |       |       |              |                                                                 |
|-----|----------|-------|-------|-------|-------|--------------|-----------------------------------------------------------------|
| 170 | EEF1E1   | 0.796 | 0.825 | 0.020 | 0.232 | NM_001135650 | eukaryotic translation elongation factor 1 epsilon 1            |
| 171 | EFHD2    | 0.774 | 0.764 | 0.016 | 0.002 | NM_024329    | EF-hand domain family member D2                                 |
| 172 | EFNA3    | 0.327 | 0.310 | 0.001 | 0.001 | NM_004952    | ephrin A3                                                       |
| 173 | EFNA4    | 0.723 | 0.710 | 0.021 | 0.019 | NM_182689    | ephrin A4                                                       |
| 174 | EFNB2    | 0.772 | 0.743 | 0.011 | 0.005 | NM_004093    | ephrin B2                                                       |
| 175 | EGR1     | 0.693 | 0.780 | 0.019 | 0.037 | NM_001964    | early growth response 1                                         |
| 176 | EGR3     | 0.428 | 0.500 | 0.012 | 0.015 | NM_004430    | early growth response 3                                         |
| 177 | EHD2     | 0.525 | 0.574 | 0.001 | 0.003 | NM_014601    | EH domain containing 2                                          |
| 178 | EHF      | 0.589 | 0.551 | 0.007 | 0.002 | NM_001206615 | ETS homologous factor                                           |
| 179 | EI24     | 0.743 | 0.737 | 0.001 | 0.003 | NM_001290135 | EI24, autophagy associated transmembrane protein                |
| 180 | EIF2B3   | 0.771 | 0.734 | 0.039 | 0.002 | NM_020365    | eukaryotic translation initiation factor 2B subunit gamma       |
| 181 | EIF3A    | 0.725 | 0.765 | 0.009 | 0.004 | NM_003750    | eukaryotic translation initiation factor 3 subunit A            |
| 182 | EIF4A1   | 0.788 | 0.750 | 0.029 | 0.004 | NM_001416    | eukaryotic translation initiation factor 4A1                    |
| 183 | EIF4EBP1 | 0.762 | 0.643 | 0.039 | 0.034 | NM_004095    | eukaryotic translation initiation factor 4E binding protein 1   |
| 184 | EIF5A    | 0.788 | 0.697 | 0.001 | 0.001 | NM_001143760 | eukaryotic translation initiation factor 5A                     |
| 185 | ELAC2    | 0.792 | 0.865 | 0.029 | 0.022 | NM_173717    | elaC ribonuclease Z 2                                           |
| 186 | ELOVL1   | 0.780 | 0.744 | 0.045 | 0.008 | NR_046117    | ELOVL fatty acid elongase 1                                     |
| 187 | EMC3     | 0.722 | 0.725 | 0.015 | 0.025 | NM_018447    | ER membrane protein complex subunit 3                           |
| 188 | EMC6     | 0.631 | 0.611 | 0.032 | 0.024 | NM_031298    | ER membrane protein complex subunit 6                           |
| 189 | EMC9     | 0.698 | 0.591 | 0.028 | 0.016 | NM_016049    | ER membrane protein complex subunit 9                           |
| 190 | EMG1     | 0.753 | 0.752 | 0.003 | 0.006 | NM_006331    | EMG1 N1-specific pseudouridine methyltransferase                |
| 191 | EMP2     | 0.718 | 0.760 | 0.046 | 0.014 | NM_001424    | epithelial membrane protein 2                                   |
| 192 | ENDOD1   | 0.728 | 0.665 | 0.005 | 0.002 | NM_015036    | endonuclease domain containing 1                                |
| 193 | ENO1     | 0.791 | 0.761 | 0.024 | 0.048 | NM_001201483 | enolase 1                                                       |
| 194 | ENTPD2   | 0.592 | 0.713 | 0.020 | 0.044 | NM_203468    | ectonucleoside triphosphate diphosphohydrolase 2                |
| 195 | EPHA1    | 0.649 | 0.686 | 0.027 | 0.018 | NM_005232    | EPH receptor A1                                                 |
| 196 | EPS8L1   | 0.257 | 0.248 | 0.011 | 0.011 | NM_133180    | EPS8 like 1                                                     |
| 197 | ERBB3    | 0.756 | 0.789 | 0.003 | 0.007 | NM_001982    | v-erb-b2 avian erythroblastic leukemia viral oncogene homolog 3 |
| 198 | ERF      | 0.744 | 0.757 | 0.014 | 0.022 | NM_001308402 | ETS2 repressor factor                                           |

|     |         |       |       |       |       |              |                                               |
|-----|---------|-------|-------|-------|-------|--------------|-----------------------------------------------|
| 199 | ETS2    | 0.576 | 0.545 | 0.003 | 0.002 | NM_001256295 | ETS proto-oncogene 2, transcription factor    |
| 200 | EVA1C   | 0.792 | 0.835 | 0.039 | 0.063 | NM_001286556 | eva-1 homolog C (C. elegans)                  |
| 201 | EXOSC2  | 0.782 | 0.808 | 0.010 | 0.004 | NR_104230    | exosome component 2                           |
| 202 | EXOSC4  | 0.674 | 0.601 | 0.021 | 0.015 | NM_019037    | exosome component 4                           |
| 203 | EXOSC7  | 0.748 | 0.739 | 0.013 | 0.165 | NM_015004    | exosome component 7                           |
| 204 | EXOSC9  | 0.778 | 0.753 | 0.000 | 0.002 | NM_005033    | exosome component 9                           |
| 205 | FABP5   | 0.708 | 0.641 | 0.046 | 0.057 | NM_001444    | fatty acid binding protein 5                  |
| 206 | FAM136A | 0.731 | 0.649 | 0.015 | 0.012 | NM_032822    | family with sequence similarity 136 member A  |
| 207 | FAM162A | 0.716 | 0.670 | 0.017 | 0.000 | NM_014367    | family with sequence similarity 162 member A  |
| 208 | FAM173A | 0.751 | 0.566 | 0.011 | 0.046 | NM_023933    | family with sequence similarity 173 member A  |
| 209 | FAM204A | 0.760 | 0.762 | 0.009 | 0.109 | NM_001134672 | family with sequence similarity 204 member A  |
| 210 | FAM207A | 0.737 | 0.662 | 0.028 | 0.016 | NM_058190    | family with sequence similarity 207 member A  |
| 211 | FAM32A  | 0.786 | 0.795 | 0.036 | 0.064 | NM_014077    | family with sequence similarity 32 member A   |
| 212 | FAM64A  | 0.569 | 0.545 | 0.023 | 0.044 | NM_019013    | family with sequence similarity 64 member A   |
| 213 | FAM83D  | 0.797 | 0.787 | 0.035 | 0.072 | NM_030919    | family with sequence similarity 83 member D   |
| 214 | FAM89A  | 0.709 | 0.742 | 0.041 | 0.091 | NM_198552    | family with sequence similarity 89 member A   |
| 215 | FANCA   | 0.774 | 0.800 | 0.031 | 0.074 | NM_000135    | Fanconi anemia complementation group A        |
| 216 | FBXL6   | 0.588 | 0.583 | 0.003 | 0.004 | NM_012162    | F-box and leucine-rich repeat protein 6       |
| 217 | FBXO5   | 0.726 | 0.821 | 0.010 | 0.134 | NM_012177    | F-box protein 5                               |
| 218 | FDFT1   | 0.689 | 0.777 | 0.013 | 0.027 | NM_001287744 | farnesyl-diphosphate farnesyltransferase 1    |
| 219 | FDPS    | 0.720 | 0.704 | 0.025 | 0.013 | NM_001135822 | farnesyl diphosphate synthase                 |
| 220 | FDXR    | 0.673 | 0.592 | 0.048 | 0.022 | NM_001258016 | ferredoxin reductase                          |
| 221 | FEM1A   | 0.788 | 0.767 | 0.039 | 0.031 | NM_018708    | fem-1 homolog A                               |
| 222 | FEN1    | 0.775 | 0.736 | 0.008 | 0.010 | NM_004111    | flap structure-specific endonuclease 1        |
| 223 | FERMT1  | 0.730 | 0.677 | 0.022 | 0.007 | NM_017671    | fermitin family member 1                      |
| 224 | FHL2    | 0.620 | 0.492 | 0.003 | 0.001 | NM_201555    | four and a half LIM domains 2                 |
| 225 | FKBP4   | 0.794 | 0.724 | 0.010 | 0.001 | NM_002014    | FK506 binding protein 4                       |
| 226 | FKBPL   | 0.711 | 0.688 | 0.002 | 0.039 | NM_022110_1  | FK506 binding protein like                    |
| 227 | FOSL1   | 0.437 | 0.405 | 0.006 | 0.008 | NM_001300844 | FOS like 1, AP-1 transcription factor subunit |



|     |         |       |       |       |       |              |                                                  |
|-----|---------|-------|-------|-------|-------|--------------|--------------------------------------------------|
| 228 | FOXD1   | 0.757 | 0.744 | 0.036 | 0.031 | NM_004472    | forkhead box D1                                  |
| 229 | FOXQ1   | 0.086 | 0.090 | 0.001 | 0.001 | NM_033260    | forkhead box Q1                                  |
| 230 | FOXRED1 | 0.787 | 0.772 | 0.048 | 0.053 | NR_037647    | FAD-dependent oxidoreductase domain containing 1 |
| 231 | FRMD8   | 0.698 | 0.716 | 0.029 | 0.044 | NM_001300832 | FERM domain containing 8                         |
| 232 | FSCN1   | 0.423 | 0.480 | 0.003 | 0.004 | NM_003088    | fascin actin-bundling protein 1                  |
| 233 | FTH1    | 0.595 | 0.562 | 0.003 | 0.002 | NM_002032    | ferritin, heavy polypeptide 1                    |
| 234 | FUS     | 0.710 | 0.774 | 0.014 | 0.045 | NR_028388    | FUS RNA binding protein                          |
| 235 | FYN     | 0.568 | 0.625 | 0.004 | 0.000 | NM_153047    | FYN proto-oncogene, Src family tyrosine kinase   |
| 236 | GAD1    | 0.365 | 0.343 | 0.015 | 0.012 | NM_000817    | glutamate decarboxylase 1                        |
| 237 | GALK1   | 0.716 | 0.666 | 0.005 | 0.008 | NM_000154    | galactokinase 1                                  |
| 238 | GCSH    | 0.711 | 0.675 | 0.011 | 0.024 | NR_033249    | glycine cleavage system protein H                |
| 239 | GDF15   | 0.334 | 0.282 | 0.006 | 0.001 | NM_004864    | growth differentiation factor 15                 |
| 240 | GGCT    | 0.726 | 0.666 | 0.007 | 0.036 | NR_037669    | gamma-glutamylcyclotransferase                   |
| 241 | GID8    | 0.738 | 0.770 | 0.019 | 0.092 | NM_017896    | GID complex subunit 8 homolog                    |
| 242 | GINS2   | 0.683 | 0.636 | 0.008 | 0.007 | NM_016095    | GINS complex subunit 2                           |
| 243 | GJB2    | 0.606 | 0.648 | 0.018 | 0.046 | NM_004004    | gap junction protein beta 2                      |
| 244 | GJB3    | 0.379 | 0.365 | 0.001 | 0.001 | NM_024009    | gap junction protein beta 3                      |
| 245 | GLCE    | 0.486 | 0.463 | 0.005 | 0.002 | NM_015554    | glucuronic acid epimerase                        |
| 246 | GLRX5   | 0.781 | 0.718 | 0.026 | 0.028 | NM_016417    | glutaredoxin 5                                   |
| 247 | GLS2    | 0.661 | 0.698 | 0.020 | 0.016 | NM_001280798 | glutaminase 2                                    |
| 248 | GMNN    | 0.718 | 0.687 | 0.013 | 0.050 | NM_001251990 | geminin, DNA replication inhibitor               |
| 249 | GNG5    | 0.739 | 0.616 | 0.004 | 0.001 | NM_005274    | G protein subunit gamma 5                        |
| 250 | GNL2    | 0.777 | 0.713 | 0.005 | 0.006 | NM_013285    | G protein nucleolar 2                            |
| 251 | GNL3    | 0.767 | 0.834 | 0.008 | 0.030 | NM_206826    | G protein nucleolar 3                            |
| 252 | GPATCH4 | 0.792 | 0.799 | 0.007 | 0.038 | NM_182679    | G-patch domain containing 4                      |
| 253 | GPC1    | 0.506 | 0.502 | 0.023 | 0.024 | NM_002081    | glypican 1                                       |
| 254 | GPX1    | 0.639 | 0.577 | 0.008 | 0.001 | NM_000581    | glutathione peroxidase 1                         |
| 255 | GRHL3   | 0.794 | 0.742 | 0.019 | 0.026 | NM_198173    | grainyhead like transcription factor 3           |
| 256 | GRPEL1  | 0.749 | 0.681 | 0.036 | 0.021 | NM_025196    | GrpE like 1, mitochondrial                       |

|     |         |       |       |       |       |              |                                                                              |
|-----|---------|-------|-------|-------|-------|--------------|------------------------------------------------------------------------------|
| 257 | GTF2H4  | 0.681 | 0.686 | 0.009 | 0.027 | NM_001517    | general transcription factor IIH subunit 4                                   |
| 258 | GYLTL1B | 0.647 | 0.685 | 0.032 | 0.045 | NM_152312    | glycosyltransferase-like 1B                                                  |
| 259 | H1FX    | 0.696 | 0.667 | 0.003 | 0.003 | NM_006026    | H1 histone family member X                                                   |
| 260 | H2AFX   | 0.473 | 0.470 | 0.000 | 0.000 | NM_002105    | H2A histone family member X                                                  |
| 261 | H2AFZ   | 0.776 | 0.654 | 0.008 | 0.032 | NM_002106    | H2A histone family member Z                                                  |
| 262 | H3F3B   | 0.647 | 0.587 | 0.000 | 0.007 | NM_005324    | H3 histone, family 3B (H3.3B)                                                |
| 263 | HABP4   | 0.789 | 0.767 | 0.004 | 0.003 | NM_014282    | hyaluronan binding protein 4                                                 |
| 264 | HDDC2   | 0.760 | 0.838 | 0.031 | 0.011 | NM_016063    | HD domain containing 2                                                       |
| 265 | HES4    | 0.726 | 0.685 | 0.037 | 0.017 | NM_021170    | hes family bHLH transcription factor 4                                       |
| 266 | HES6    | 0.577 | 0.562 | 0.009 | 0.014 | NM_001282434 | hes family bHLH transcription factor 6                                       |
| 267 | HEXIM1  | 0.645 | 0.703 | 0.003 | 0.049 | NM_006460    | hexamethylene bis-acetamide inducible 1                                      |
| 268 | HIGD1A  | 0.767 | 0.693 | 0.003 | 0.015 | NM_001099669 | HIG1 hypoxia inducible domain family member 1A                               |
| 269 | HK2     | 0.693 | 0.687 | 0.006 | 0.011 | NM_000189    | hexokinase 2                                                                 |
| 270 | HMG20B  | 0.759 | 0.756 | 0.021 | 0.004 | NM_006339    | high mobility group 20B                                                      |
| 271 | HMGB1   | 0.759 | 0.745 | 0.027 | 0.036 | NM_002128    | high mobility group box 1                                                    |
| 272 | HMGCS1  | 0.561 | 0.654 | 0.040 | 0.030 | NM_002130    | 3-hydroxy-3-methylglutaryl-CoA synthase 1                                    |
| 273 | HMGN1   | 0.757 | 0.709 | 0.017 | 0.077 | NM_004965    | high mobility group nucleosome binding domain 1                              |
| 274 | HMGN3   | 0.617 | 0.626 | 0.006 | 0.065 | NM_138730    | high mobility group nucleosomal binding domain 3                             |
| 275 | HN1     | 0.752 | 0.706 | 0.026 | 0.014 | NM_001002032 | hematological and neurological expressed 1                                   |
| 276 | HNF4A   | 0.623 | 0.688 | 0.032 | 0.032 | NM_001287183 | hepatocyte nuclear factor 4 alpha                                            |
| 277 | HNRNPDL | 0.663 | 0.716 | 0.015 | 0.009 | NR_003249    | heterogeneous nuclear ribonucleoprotein D like                               |
| 278 | HOMER3  | 0.731 | 0.651 | 0.033 | 0.002 | NM_001145721 | homer scaffolding protein 3                                                  |
| 279 | HPGD    | 0.799 | 0.692 | 0.033 | 0.044 | NM_000860    | hydroxyprostaglandin dehydrogenase 15-(NAD)                                  |
| 280 | HPS6    | 0.784 | 0.744 | 0.016 | 0.019 | NM_024747    | HPS6, biogenesis of lysosomal organelles complex 2 subunit 3                 |
| 281 | HR      | 0.312 | 0.345 | 0.037 | 0.041 | NM_005144    | hair growth associated                                                       |
| 282 | HSD11B2 | 0.555 | 0.682 | 0.010 | 0.006 | NM_000196    | hydroxysteroid (11-beta) dehydrogenase 2                                     |
| 283 | HSD3B7  | 0.677 | 0.652 | 0.002 | 0.008 | NM_025193    | hydroxy-delta-5-steroid dehydrogenase, 3 beta- and steroid delta-isomerase 7 |
| 284 | HSPB1   | 0.700 | 0.640 | 0.010 | 0.015 | NM_001540    | heat shock protein family B (small) member 1                                 |
| 285 | HSPE1   | 0.755 | 0.676 | 0.020 | 0.095 | NM_002157    | heat shock protein family E (Hsp10) member 1                                 |

|     |          |       |       |       |       |              |                                                                  |
|-----|----------|-------|-------|-------|-------|--------------|------------------------------------------------------------------|
| 286 | HSPH1    | 0.745 | 0.799 | 0.007 | 0.012 | NM_001286504 | heat shock protein family H (Hsp110) member 1                    |
| 287 | HYAL2    | 0.644 | 0.697 | 0.000 | 0.000 | NM_033158    | hyaluronoglucosaminidase 2                                       |
| 288 | HYPK     | 0.727 | 0.572 | 0.012 | 0.031 | NM_001199885 | huntingtin interacting protein K                                 |
| 289 | ICT1     | 0.695 | 0.553 | 0.031 | 0.003 | NM_001303265 | immature colon carcinoma transcript 1                            |
| 290 | IDH2     | 0.745 | 0.730 | 0.037 | 0.014 | NM_002168    | isocitrate dehydrogenase (NADP(+)) 2, mitochondrial              |
| 291 | IDI1     | 0.697 | 0.738 | 0.036 | 0.073 | NM_004508    | isopentenyl-diphosphate delta isomerase 1                        |
| 292 | IDS      | 0.800 | 0.818 | 0.004 | 0.014 | NM_000202    | iduronate 2-sulfatase                                            |
| 293 | IER2     | 0.731 | 0.760 | 0.016 | 0.066 | NM_004907    | immediate early response 2                                       |
| 294 | IER3     | 0.768 | 0.678 | 0.004 | 0.002 | NM_003897_4  | immediate early response 3                                       |
| 295 | IER5     | 0.503 | 0.514 | 0.003 | 0.008 | NM_016545    | immediate early response 5                                       |
| 296 | IER5L    | 0.347 | 0.355 | 0.005 | 0.005 | NM_203434    | immediate early response 5-like                                  |
| 297 | IFITM3   | 0.728 | 0.696 | 0.005 | 0.009 | NR_049759    | interferon induced transmembrane protein 3                       |
| 298 | IGFBP2   | 0.671 | 0.663 | 0.042 | 0.054 | NM_000597    | insulin like growth factor binding protein 2                     |
| 299 | IGFBP4   | 0.449 | 0.396 | 0.007 | 0.008 | NM_001552    | insulin like growth factor binding protein 4                     |
| 300 | IGFL2    | 0.044 | 0.051 | 0.002 | 0.002 | NM_001002915 | IGF like family member 2                                         |
| 301 | IL27RA   | 0.714 | 0.660 | 0.049 | 0.038 | NM_004843    | interleukin 27 receptor subunit alpha                            |
| 302 | IMP3     | 0.771 | 0.707 | 0.015 | 0.011 | NM_018285    | IMP3, U3 small nucleolar ribonucleoprotein                       |
| 303 | IMP4     | 0.768 | 0.701 | 0.040 | 0.034 | NM_033416    | IMP4 homolog, U3 small nucleolar ribonucleoprotein               |
| 304 | IMPA2    | 0.752 | 0.724 | 0.013 | 0.012 | NM_014214    | inositol monophosphatase 2                                       |
| 305 | INSIG1   | 0.513 | 0.580 | 0.017 | 0.009 | NM_005542    | insulin induced gene 1                                           |
| 306 | IRF2BP2  | 0.769 | 0.749 | 0.000 | 0.005 | NM_182972    | interferon regulatory factor 2 binding protein 2                 |
| 307 | ISOC2    | 0.789 | 0.650 | 0.039 | 0.004 | NM_024710    | isochorismatase domain containing 2                              |
| 308 | ISYNA1   | 0.441 | 0.456 | 0.013 | 0.014 | NM_001170938 | inositol-3-phosphate synthase 1                                  |
| 309 | ITGA6    | 0.606 | 0.577 | 0.013 | 0.007 | NM_000210    | integrin subunit alpha 6                                         |
| 310 | ITPKA    | 0.526 | 0.574 | 0.033 | 0.009 | NM_002220    | inositol-trisphosphate 3-kinase A                                |
| 311 | JTB      | 0.757 | 0.656 | 0.009 | 0.027 | NM_006694    | jumping translocation breakpoint                                 |
| 312 | KCNE3    | 0.645 | 0.696 | 0.011 | 0.006 | NM_005472    | potassium voltage-gated channel subfamily E regulatory subunit 3 |
| 313 | KCTD15   | 0.725 | 0.766 | 0.011 | 0.063 | NM_001129995 | potassium channel tetramerization domain containing 15           |
| 314 | KIAA0101 | 0.800 | 0.664 | 0.011 | 0.045 | NR_109934    | KIAA0101                                                         |

|     |          |       |       |       |       |              |                                                                    |
|-----|----------|-------|-------|-------|-------|--------------|--------------------------------------------------------------------|
| 315 | KIAA0930 | 0.738 | 0.750 | 0.036 | 0.034 | NM_015264    | KIAA0930                                                           |
| 316 | KIF20A   | 0.781 | 0.864 | 0.031 | 0.110 | NM_005733    | kinesin family member 20A                                          |
| 317 | KITLG    | 0.650 | 0.752 | 0.018 | 0.034 | NM_003994    | KIT ligand                                                         |
| 318 | KLF13    | 0.759 | 0.780 | 0.008 | 0.007 | NM_015995    | Kruppel-like factor 13                                             |
| 319 | KLF5     | 0.604 | 0.529 | 0.002 | 0.005 | NM_001286818 | Kruppel-like factor 5 (intestinal)                                 |
| 320 | KLK10    | 0.572 | 0.531 | 0.001 | 0.001 | NM_001077500 | kallikrein related peptidase 10                                    |
| 321 | KLK11    | 0.113 | 0.236 | 0.002 | 0.004 | NM_144947    | kallikrein related peptidase 11                                    |
| 322 | KLK6     | 0.126 | 0.112 | 0.000 | 0.000 | NM_001012965 | kallikrein related peptidase 6                                     |
| 323 | KLK7     | 0.607 | 0.587 | 0.002 | 0.010 | NM_001243126 | kallikrein related peptidase 7                                     |
| 324 | KRT18    | 0.566 | 0.423 | 0.015 | 0.011 | NM_199187    | keratin 18                                                         |
| 325 | KRT19    | 0.041 | 0.040 | 0.000 | 0.000 | NM_002276    | keratin 19                                                         |
| 326 | KRT8     | 0.534 | 0.428 | 0.002 | 0.002 | NM_001256293 | keratin 8                                                          |
| 327 | LAD1     | 0.623 | 0.614 | 0.007 | 0.023 | NM_005558    | ladinin 1                                                          |
| 328 | LAMB3    | 0.498 | 0.483 | 0.005 | 0.013 | NM_001017402 | laminin subunit beta 3                                             |
| 329 | LAMC2    | 0.472 | 0.421 | 0.006 | 0.003 | NM_018891    | laminin subunit gamma 2                                            |
| 330 | LAMTOR4  | 0.720 | 0.621 | 0.029 | 0.024 | NM_001008395 | late endosomal/lysosomal adaptor, MAPK and MTOR activator 4        |
| 331 | LANCL1   | 0.782 | 0.789 | 0.008 | 0.005 | NM_006055    | LanC like 1                                                        |
| 332 | LCN2     | 0.041 | 0.039 | 0.012 | 0.012 | NM_005564    | lipocalin 2                                                        |
| 333 | LDLR     | 0.666 | 0.731 | 0.004 | 0.023 | NM_001195803 | low density lipoprotein receptor                                   |
| 334 | LFNG     | 0.378 | 0.448 | 0.010 | 0.010 | NM_001166355 | LFNG O-fucosylpeptide 3-beta-N-acetylglucosaminyltransferase       |
| 335 | LIME1    | 0.521 | 0.530 | 0.004 | 0.016 | NM_001305654 | Lck interacting transmembrane adaptor 1                            |
| 336 | LLGL2    | 0.730 | 0.659 | 0.029 | 0.003 | NM_004524    | LLGL2, scribble cell polarity complex component                    |
| 337 | LMNA     | 0.741 | 0.620 | 0.018 | 0.015 | NM_001282625 | lamin A/C                                                          |
| 338 | LRFN4    | 0.647 | 0.669 | 0.017 | 0.020 | NM_024036    | leucine rich repeat and fibronectin type III domain containing 4   |
| 339 | LRP8     | 0.725 | 0.769 | 0.007 | 0.010 | NM_001018054 | LDL receptor related protein 8                                     |
| 340 | LRRC45   | 0.656 | 0.629 | 0.016 | 0.014 | NM_144999    | leucine rich repeat containing 45                                  |
| 341 | LSM1     | 0.751 | 0.807 | 0.013 | 0.012 | NR_045492    | LSM1 homolog, mRNA degradation associated                          |
| 342 | LSM10    | 0.695 | 0.665 | 0.038 | 0.094 | NM_032881    | LSM10, U7 small nuclear RNA associated                             |
| 343 | LSM2     | 0.781 | 0.676 | 0.028 | 0.004 | NM_021177    | LSM2 homolog, U6 small nuclear RNA and mRNA degradation associated |

|     |          |       |       |       |       |              |                                                            |
|-----|----------|-------|-------|-------|-------|--------------|------------------------------------------------------------|
| 344 | LSS      | 0.704 | 0.692 | 0.020 | 0.021 | NM_001001438 | lanosterol synthase (2,3-oxidosqualene-lanosterol cyclase) |
| 345 | LTBP3    | 0.636 | 0.666 | 0.018 | 0.003 | NM_001130144 | latent transforming growth factor beta binding protein 3   |
| 346 | LY6E     | 0.688 | 0.615 | 0.015 | 0.014 | NM_002346    | lymphocyte antigen 6 complex, locus E                      |
| 347 | LYAR     | 0.620 | 0.654 | 0.004 | 0.016 | NM_017816    | Ly1 antibody reactive                                      |
| 348 | LYRM1    | 0.371 | 0.288 | 0.000 | 0.001 | NM_020424    | LYR motif containing 1                                     |
| 349 | MAD2L1   | 0.790 | 0.689 | 0.010 | 0.026 | NM_002358    | MAD2 mitotic arrest deficient-like 1 (yeast)               |
| 350 | MAGEF1   | 0.769 | 0.758 | 0.032 | 0.040 | NM_022149    | MAGE family member F1                                      |
| 351 | MAN1A1   | 0.687 | 0.599 | 0.005 | 0.001 | NM_005907    | mannosidase alpha class 1A member 1                        |
| 352 | MAOB     | 0.237 | 0.163 | 0.005 | 0.002 | NM_000898    | monoamine oxidase B                                        |
| 353 | MAPRE3   | 0.637 | 0.582 | 0.007 | 0.013 | NM_012326    | microtubule associated protein RP/EB family member 3       |
| 354 | MARCKSL1 | 0.700 | 0.724 | 0.002 | 0.026 | NM_023009    | MARCKS-like 1                                              |
| 355 | MBOAT2   | 0.582 | 0.605 | 0.001 | 0.026 | NM_138799    | membrane bound O-acyltransferase domain containing 2       |
| 356 | MCAT     | 0.786 | 0.765 | 0.006 | 0.006 | NR_046423    | malonyl-CoA-acyl carrier protein transacylase              |
| 357 | MCM2     | 0.727 | 0.741 | 0.033 | 0.037 | NM_004526    | minichromosome maintenance complex component 2             |
| 358 | MCM4     | 0.792 | 0.788 | 0.003 | 0.012 | NM_182746    | minichromosome maintenance complex component 4             |
| 359 | MCM6     | 0.736 | 0.738 | 0.019 | 0.012 | NM_005915    | minichromosome maintenance complex component 6             |
| 360 | MCM7     | 0.704 | 0.675 | 0.006 | 0.004 | NM_182776    | minichromosome maintenance complex component 7             |
| 361 | MDK      | 0.304 | 0.443 | 0.001 | 0.002 | NM_001270550 | midkine (neurite growth-promoting factor 2)                |
| 362 | MEMO1    | 0.787 | 0.731 | 0.012 | 0.027 | NR_126034    | mediator of cell motility 1                                |
| 363 | METRNL   | 0.695 | 0.633 | 0.044 | 0.004 | NM_024042    | meteorin, glial cell differentiation regulator             |
| 364 | METRNL   | 0.581 | 0.642 | 0.016 | 0.119 | NM_001004431 | meteorin, glial cell differentiation regulator-like        |
| 365 | METTL17  | 0.774 | 0.862 | 0.009 | 0.176 | NM_001029991 | methyltransferase like 17                                  |
| 366 | METTL2B  | 0.796 | 0.881 | 0.014 | 0.055 | NM_018396    | methyltransferase like 2B                                  |
| 367 | MICA     | 0.632 | 0.597 | 0.009 | 0.007 | NM_001289153 | MHC class I polypeptide-related sequence A                 |
| 368 | MID1IP1  | 0.733 | 0.724 | 0.024 | 0.017 | NM_021242    | MID1 interacting protein 1                                 |
| 369 | MIPEP    | 0.630 | 0.602 | 0.018 | 0.016 | NM_005932    | mitochondrial intermediate peptidase                       |
| 370 | MIR31HG  | 0.786 | 0.720 | 0.016 | 0.009 | NR_027054    | MIR31 host gene                                            |
| 371 | MISP     | 0.169 | 0.201 | 0.003 | 0.003 | NM_173481    | mitotic spindle positioning                                |
| 372 | MKNK2    | 0.756 | 0.793 | 0.031 | 0.048 | NM_017572    | MAP kinase interacting serine/threonine kinase 2           |

|     |        |       |       |       |       |              |                                          |
|-----|--------|-------|-------|-------|-------|--------------|------------------------------------------|
| 373 | MLF2   | 0.725 | 0.743 | 0.018 | 0.016 | NR_026581    | myeloid leukemia factor 2                |
| 374 | MPP7   | 0.588 | 0.549 | 0.013 | 0.001 | NM_173496    | membrane palmitoylated protein 7         |
| 375 | MPZL2  | 0.687 | 0.703 | 0.002 | 0.006 | NM_005797    | myelin protein zero like 2               |
| 376 | MRPL11 | 0.739 | 0.712 | 0.021 | 0.007 | NM_170739    | mitochondrial ribosomal protein L11      |
| 377 | MRPL14 | 0.665 | 0.555 | 0.007 | 0.027 | NM_032111    | mitochondrial ribosomal protein L14      |
| 378 | MRPL16 | 0.784 | 0.802 | 0.033 | 0.117 | NM_017840    | mitochondrial ribosomal protein L16      |
| 379 | MRPL20 | 0.715 | 0.636 | 0.028 | 0.028 | NM_017971    | mitochondrial ribosomal protein L20      |
| 380 | MRPL22 | 0.797 | 0.705 | 0.015 | 0.038 | NM_001014990 | mitochondrial ribosomal protein L22      |
| 381 | MRPL33 | 0.707 | 0.565 | 0.030 | 0.033 | NM_145330    | mitochondrial ribosomal protein L33      |
| 382 | MRPL35 | 0.717 | 0.774 | 0.011 | 0.013 | NM_145644    | mitochondrial ribosomal protein L35      |
| 383 | MRPL36 | 0.707 | 0.637 | 0.038 | 0.000 | NM_032479    | mitochondrial ribosomal protein L36      |
| 384 | MRPL4  | 0.713 | 0.702 | 0.010 | 0.005 | NM_146387    | mitochondrial ribosomal protein L4       |
| 385 | MRPL44 | 0.743 | 0.781 | 0.007 | 0.091 | NM_022915    | mitochondrial ribosomal protein L44      |
| 386 | MRPL50 | 0.721 | 0.728 | 0.017 | 0.080 | NM_019051    | mitochondrial ribosomal protein L50      |
| 387 | MRPL52 | 0.687 | 0.610 | 0.023 | 0.013 | NM_180982    | mitochondrial ribosomal protein L52      |
| 388 | MRPL57 | 0.634 | 0.621 | 0.008 | 0.012 | NM_024026    | mitochondrial ribosomal protein L57      |
| 389 | MRPS2  | 0.791 | 0.765 | 0.004 | 0.018 | NR_051970    | mitochondrial ribosomal protein S2       |
| 390 | MRPS21 | 0.754 | 0.738 | 0.028 | 0.110 | NM_031901    | mitochondrial ribosomal protein S21      |
| 391 | MRPS22 | 0.739 | 0.714 | 0.015 | 0.006 | NM_020191    | mitochondrial ribosomal protein S22      |
| 392 | MRPS23 | 0.742 | 0.713 | 0.003 | 0.004 | NM_016070    | mitochondrial ribosomal protein S23      |
| 393 | MRPS24 | 0.757 | 0.654 | 0.003 | 0.003 | NM_032014    | mitochondrial ribosomal protein S24      |
| 394 | MRPS26 | 0.724 | 0.655 | 0.017 | 0.004 | NM_030811    | mitochondrial ribosomal protein S26      |
| 395 | MRTO4  | 0.676 | 0.654 | 0.015 | 0.000 | NM_016183    | MRT4 homolog, ribosome maturation factor |
| 396 | MSLN   | 0.064 | 0.054 | 0.009 | 0.009 | NM_005823    | mesothelin                               |
| 397 | MSMO1  | 0.612 | 0.658 | 0.001 | 0.031 | NM_006745    | methylsterol monooxygenase 1             |
| 398 | MT1E   | 0.581 | 0.474 | 0.002 | 0.002 | NM_175617    | metallothionein 1E                       |
| 399 | MT1F   | 0.443 | 0.416 | 0.006 | 0.007 | NM_005949    | metallothionein 1F                       |
| 400 | MT1G   | 0.381 | 0.255 | 0.016 | 0.022 | NM_001301267 | metallothionein 1G                       |
| 401 | MT1X   | 0.464 | 0.405 | 0.014 | 0.023 | NM_005952    | metallothionein 1X                       |

|     |           |       |       |       |       |              |                                                       |
|-----|-----------|-------|-------|-------|-------|--------------|-------------------------------------------------------|
| 402 | MT2A      | 0.446 | 0.350 | 0.001 | 0.007 | NM_005953    | metallothionein 2A                                    |
| 403 | MTA2      | 0.727 | 0.820 | 0.009 | 0.123 | NM_004739    | metastasis associated 1 family member 2               |
| 404 | MVD       | 0.798 | 0.825 | 0.022 | 0.038 | NM_002461    | mevalonate diphosphate decarboxylase                  |
| 405 | MXD3      | 0.683 | 0.726 | 0.012 | 0.001 | NM_001142935 | MAX dimerization protein 3                            |
| 406 | MYEOV2    | 0.596 | 0.430 | 0.006 | 0.018 | NM_138336    | .                                                     |
| 407 | MYO1B     | 0.758 | 0.770 | 0.025 | 0.027 | NM_001130158 | myosin IB                                             |
| 408 | MYO5B     | 0.715 | 0.786 | 0.003 | 0.023 | NM_001080467 | myosin VB                                             |
| 409 | NAA10     | 0.781 | 0.697 | 0.041 | 0.001 | NM_001256120 | N(alpha)-acetyltransferase 10, NatA catalytic subunit |
| 410 | NAB2      | 0.723 | 0.752 | 0.023 | 0.072 | NM_005967    | NGFI-A binding protein 2                              |
| 411 | NAPG      | 0.594 | 0.596 | 0.002 | 0.008 | NM_003826    | NSF attachment protein gamma                          |
| 412 | NARF      | 0.775 | 0.845 | 0.045 | 0.102 | NM_001038618 | nuclear prelamin A recognition factor                 |
| 413 | NASP      | 0.723 | 0.731 | 0.002 | 0.013 | NM_001195193 | nuclear autoantigenic sperm protein                   |
| 414 | NBL1      | 0.416 | 0.435 | 0.005 | 0.003 | NM_001278164 | neuroblastoma 1, DAN family BMP antagonist            |
| 415 | NCBP2     | 0.682 | 0.674 | 0.020 | 0.042 | NM_007362    | nuclear cap binding protein subunit 2                 |
| 416 | NCBP2-AS2 | 0.698 | 0.691 | 0.034 | 0.064 | NR_024388    | NCBP2 antisense RNA 2 (head to head)                  |
| 417 | NCL       | 0.761 | 0.790 | 0.007 | 0.016 | NM_005381    | nucleolin                                             |
| 418 | NDNL2     | 0.774 | 0.749 | 0.020 | 0.052 | NM_138704    | .                                                     |
| 419 | NDUFA10   | 0.772 | 0.725 | 0.017 | 0.012 | NM_004544    | NADH:ubiquinone oxidoreductase subunit A10            |
| 420 | NDUFB4    | 0.704 | 0.560 | 0.010 | 0.019 | NM_004547    | NADH:ubiquinone oxidoreductase subunit B4             |
| 421 | NDUFS5    | 0.736 | 0.645 | 0.039 | 0.023 | NM_001184979 | NADH:ubiquinone oxidoreductase subunit S5             |
| 422 | NDUFV1    | 0.782 | 0.755 | 0.038 | 0.027 | NM_001166102 | NADH dehydrogenase (ubiquinone) flavoprotein 1, 51kDa |
| 423 | NDUFV2    | 0.720 | 0.672 | 0.003 | 0.022 | NM_021074    | NADH:ubiquinone oxidoreductase core subunit V2        |
| 424 | NFE2L3    | 0.762 | 0.736 | 0.006 | 0.010 | NM_004289    | nuclear factor, erythroid 2 like 3                    |
| 425 | NIPSNAP1  | 0.739 | 0.757 | 0.002 | 0.009 | NM_001202502 | nipsnap homolog 1 (C. elegans)                        |
| 426 | NKD2      | 0.256 | 0.406 | 0.004 | 0.009 | NM_001271082 | naked cuticle homolog 2                               |
| 427 | NMB       | 0.739 | 0.586 | 0.038 | 0.011 | NM_205858    | neuromedin B                                          |
| 428 | NME1      | 0.713 | 0.665 | 0.002 | 0.001 | NM_198175    | NME/NM23 nucleoside diphosphate kinase 1              |
| 429 | NOC4L     | 0.726 | 0.794 | 0.018 | 0.052 | NM_024078    | nucleolar complex associated 4 homolog                |
| 430 | NOL11     | 0.768 | 0.773 | 0.010 | 0.011 | NM_001303272 | nucleolar protein 11                                  |

|     |         |       |       |       |       |              |                                                                              |
|-----|---------|-------|-------|-------|-------|--------------|------------------------------------------------------------------------------|
| 431 | NOP2    | 0.716 | 0.773 | 0.011 | 0.024 | NM_001033714 | NOP2 nucleolar protein                                                       |
| 432 | NOP56   | 0.773 | 0.770 | 0.002 | 0.022 | NM_006392    | NOP56 ribonucleoprotein                                                      |
| 433 | NOTUM   | 0.367 | 0.472 | 0.000 | 0.004 | NM_178493    | NOTUM, palmitoleoyl-protein carboxylesterase                                 |
| 434 | NPNT    | 0.699 | 0.694 | 0.005 | 0.001 | NM_001033047 | nephronectin                                                                 |
| 435 | NR4A1   | 0.543 | 0.501 | 0.032 | 0.019 | NM_001202233 | nuclear receptor subfamily 4 group A member 1                                |
| 436 | NSMF    | 0.742 | 0.796 | 0.043 | 0.068 | NM_001130970 | NMDA receptor synaptonuclear signaling and neuronal migration factor         |
| 437 | NSUN2   | 0.777 | 0.727 | 0.005 | 0.003 | NM_017755    | NOP2/Sun RNA methyltransferase family member 2                               |
| 438 | NTMT1   | 0.696 | 0.622 | 0.001 | 0.044 | NM_001286796 | N-terminal Xaa-Pro-Lys N-methyltransferase 1                                 |
| 439 | NUDT15  | 0.646 | 0.597 | 0.013 | 0.012 | NM_018283    | nudix hydrolase 15                                                           |
| 440 | NUMBL   | 0.751 | 0.874 | 0.038 | 0.178 | NM_001289980 | NUMB like, endocytic adaptor protein                                         |
| 441 | NXPH4   | 0.797 | 0.739 | 0.024 | 0.031 | NM_007224    | neurexophilin 4                                                              |
| 442 | NXT1    | 0.770 | 0.682 | 0.018 | 0.101 | NM_013248    | nuclear transport factor 2 like export factor 1                              |
| 443 | OAF     | 0.693 | 0.730 | 0.018 | 0.035 | NM_178507    | out at first homolog                                                         |
| 444 | OAZ1    | 0.791 | 0.690 | 0.005 | 0.004 | NM_001301020 | ornithine decarboxylase antizyme 1                                           |
| 445 | OBSL1   | 0.716 | 0.707 | 0.007 | 0.009 | NM_015311    | obscurin-like 1                                                              |
| 446 | OSGEP   | 0.694 | 0.722 | 0.044 | 0.169 | NM_017807    | O-sialoglycoprotein endopeptidase                                            |
| 447 | OST4    | 0.669 | 0.567 | 0.009 | 0.032 | NM_001134693 | oligosaccharyltransferase complex subunit 4, non-catalytic                   |
| 448 | PA2G4   | 0.667 | 0.670 | 0.009 | 0.008 | NM_006191    | proliferation-associated 2G4                                                 |
| 449 | PAK1IP1 | 0.716 | 0.687 | 0.004 | 0.036 | NM_017906    | PAK1 interacting protein 1                                                   |
| 450 | PAM16   | 0.780 | 0.640 | 0.041 | 0.046 | NM_016069    | presequence translocase-associated motor 16 homolog ( <i>S. cerevisiae</i> ) |
| 451 | PBDC1   | 0.658 | 0.602 | 0.019 | 0.016 | NM_001300888 | polysaccharide biosynthesis domain containing 1                              |
| 452 | PCBD1   | 0.781 | 0.730 | 0.007 | 0.008 | NM_000281    | pterin-4 alpha-carbinolamine dehydratase 1                                   |
| 453 | PCNA    | 0.770 | 0.735 | 0.012 | 0.077 | NM_182649    | proliferating cell nuclear antigen                                           |
| 454 | PCSK9   | 0.534 | 0.591 | 0.017 | 0.024 | NM_174936    | proprotein convertase subtilisin/kexin type 9                                |
| 455 | PDGFA   | 0.635 | 0.608 | 0.000 | 0.007 | NM_002607    | platelet derived growth factor subunit A                                     |
| 456 | PDHB    | 0.785 | 0.816 | 0.040 | 0.065 | NR_033384    | pyruvate dehydrogenase (lipoamide) beta                                      |
| 457 | PDLIM2  | 0.729 | 0.663 | 0.026 | 0.014 | NM_021630    | PDZ and LIM domain 2                                                         |
| 458 | PDLIM7  | 0.703 | 0.679 | 0.024 | 0.046 | NM_005451    | PDZ and LIM domain 7                                                         |
| 459 | PES1    | 0.748 | 0.755 | 0.023 | 0.027 | NM_014303    | pescadillo ribosomal biogenesis factor 1                                     |



|     |         |       |       |       |       |              |                                                                          |
|-----|---------|-------|-------|-------|-------|--------------|--------------------------------------------------------------------------|
| 460 | PET100  | 0.785 | 0.657 | 0.030 | 0.147 | NR_033242    | PET100 homolog                                                           |
| 461 | PET117  | 0.699 | 0.596 | 0.000 | 0.001 | NM_001164811 | PET117 homolog                                                           |
| 462 | PFDN2   | 0.721 | 0.643 | 0.015 | 0.127 | NM_012394    | prefoldin subunit 2                                                      |
| 463 | PFN1    | 0.714 | 0.715 | 0.005 | 0.013 | NM_005022    | profilin 1                                                               |
| 464 | PGAM1   | 0.704 | 0.669 | 0.001 | 0.001 | NM_002629    | phosphoglycerate mutase 1                                                |
| 465 | PGAM5   | 0.771 | 0.774 | 0.032 | 0.047 | NM_001170543 | PGAM family member 5, mitochondrial serine/threonine protein phosphatase |
| 466 | PGD     | 0.714 | 0.743 | 0.004 | 0.009 | NM_002631    | phosphogluconate dehydrogenase                                           |
| 467 | PHLDA1  | 0.360 | 0.263 | 0.000 | 0.000 | NM_007350    | pleckstrin homology like domain family A member 1                        |
| 468 | PHLDA2  | 0.443 | 0.384 | 0.000 | 0.002 | NM_003311    | pleckstrin homology like domain family A member 2                        |
| 469 | PIN1    | 0.769 | 0.698 | 0.030 | 0.023 | NR_038830    | peptidylprolyl cis/trans isomerase, NIMA-interacting 1                   |
| 470 | PKMYT1  | 0.785 | 0.767 | 0.019 | 0.021 | NM_182687    | protein kinase, membrane associated tyrosine/threonine 1                 |
| 471 | PLAUR   | 0.328 | 0.325 | 0.006 | 0.001 | NM_001005376 | plasminogen activator, urokinase receptor                                |
| 472 | PLBD1   | 0.443 | 0.379 | 0.003 | 0.002 | NM_024829    | phospholipase B domain containing 1                                      |
| 473 | PLCD3   | 0.707 | 0.700 | 0.044 | 0.039 | NM_133373    | phospholipase C delta 3                                                  |
| 474 | PLEKHF2 | 0.707 | 0.606 | 0.004 | 0.002 | NM_024613    | pleckstrin homology and FYVE domain containing 2                         |
| 475 | PLEKHJ1 | 0.797 | 0.715 | 0.043 | 0.008 | NM_001300836 | pleckstrin homology domain containing J1                                 |
| 476 | PLK2    | 0.617 | 0.590 | 0.013 | 0.034 | NM_001252226 | polo like kinase 2                                                       |
| 477 | PMPCA   | 0.754 | 0.782 | 0.015 | 0.058 | NM_015160    | peptidase, mitochondrial processing alpha subunit                        |
| 478 | PNKP    | 0.775 | 0.829 | 0.045 | 0.283 | NM_007254    | polynucleotide kinase 3'-phosphatase                                     |
| 479 | PNO1    | 0.738 | 0.694 | 0.001 | 0.001 | NM_020143    | partner of NOB1 homolog                                                  |
| 480 | PNP     | 0.733 | 0.736 | 0.005 | 0.000 | NM_000270    | purine nucleoside phosphorylase                                          |
| 481 | POLD2   | 0.756 | 0.732 | 0.049 | 0.072 | NM_001127218 | polymerase (DNA) delta 2, accessory subunit                              |
| 482 | POLR2C  | 0.783 | 0.811 | 0.027 | 0.001 | NM_032940    | polymerase (RNA) II subunit C                                            |
| 483 | POLR2G  | 0.763 | 0.778 | 0.034 | 0.035 | NM_002696    | polymerase (RNA) II subunit G                                            |
| 484 | POLR2J  | 0.675 | 0.689 | 0.036 | 0.062 | NM_006234    | polymerase (RNA) II subunit J                                            |
| 485 | POLR2L  | 0.585 | 0.531 | 0.007 | 0.035 | NM_021128    | polymerase (RNA) II subunit L                                            |
| 486 | POLR3K  | 0.691 | 0.531 | 0.003 | 0.008 | NM_016310    | polymerase (RNA) III subunit K                                           |
| 487 | POMGNT2 | 0.750 | 0.821 | 0.013 | 0.058 | NM_032806    | protein O-linked mannose N-acetylglucosaminyltransferase 2 (beta 1,4-)   |
| 488 | PON2    | 0.702 | 0.626 | 0.009 | 0.009 | NM_001018161 | paraoxonase 2                                                            |

|     |          |       |       |       |       |              |                                                        |
|-----|----------|-------|-------|-------|-------|--------------|--------------------------------------------------------|
| 489 | PPFIBP1  | 0.792 | 0.767 | 0.002 | 0.001 | NM_001198916 | PPFIA binding protein 1                                |
| 490 | PPIF     | 0.749 | 0.758 | 0.028 | 0.032 | NM_005729    | peptidylprolyl isomerase F                             |
| 491 | PPP1R14B | 0.741 | 0.670 | 0.047 | 0.008 | NM_138689    | protein phosphatase 1 regulatory inhibitor subunit 14B |
| 492 | PPP1R18  | 0.733 | 0.765 | 0.012 | 0.009 | NM_133471_5  | protein phosphatase 1 regulatory subunit 18            |
| 493 | PPP2R1B  | 0.797 | 0.830 | 0.024 | 0.144 | NM_181699    | protein phosphatase 2 regulatory subunit A, beta       |
| 494 | PQLC1    | 0.780 | 0.761 | 0.008 | 0.009 | NM_001146343 | PQ loop repeat containing 1                            |
| 495 | PRKCD    | 0.647 | 0.695 | 0.048 | 0.038 | NM_006254    | protein kinase C delta                                 |
| 496 | PRMT1    | 0.771 | 0.694 | 0.034 | 0.008 | NM_001207042 | protein arginine methyltransferase 1                   |
| 497 | PROCR    | 0.777 | 0.661 | 0.001 | 0.002 | NM_006404    | protein C receptor                                     |
| 498 | PRPF4    | 0.750 | 0.815 | 0.027 | 0.041 | NM_001244926 | pre-mRNA processing factor 4                           |
| 499 | PRPS2    | 0.752 | 0.741 | 0.000 | 0.003 | NM_002765    | phosphoribosyl pyrophosphate synthetase 2              |
| 500 | PRR5     | 0.721 | 0.721 | 0.049 | 0.086 | NM_001017529 | proline rich 5                                         |
| 501 | PSMD6    | 0.785 | 0.753 | 0.001 | 0.014 | NM_014814    | proteasome 26S subunit, non-ATPase 6                   |
| 502 | PSMD7    | 0.779 | 0.744 | 0.045 | 0.028 | NM_002811    | proteasome 26S subunit, non-ATPase 7                   |
| 503 | PSMD8    | 0.792 | 0.740 | 0.043 | 0.035 | NM_002812    | proteasome 26S subunit, non-ATPase 8                   |
| 504 | PSMG3    | 0.685 | 0.694 | 0.030 | 0.057 | NM_032302    | proteasome assembly chaperone 3                        |
| 505 | PSRC1    | 0.674 | 0.757 | 0.048 | 0.041 | NM_032636    | proline and serine rich coiled-coil 1                  |
| 506 | PTMA     | 0.662 | 0.614 | 0.012 | 0.013 | NM_002823    | prothymosin, alpha                                     |
| 507 | PTMS     | 0.635 | 0.602 | 0.006 | 0.001 | NM_002824    | parathymosin                                           |
| 508 | PTPN2    | 0.764 | 0.758 | 0.041 | 0.037 | NM_080423    | protein tyrosine phosphatase, non-receptor type 2      |
| 509 | PTPRO    | 0.417 | 0.396 | 0.005 | 0.009 | NM_030667    | protein tyrosine phosphatase, receptor type O          |
| 510 | PTRF     | 0.695 | 0.985 | 0.045 | 0.830 | NM_012232    | polymerase I and transcript release factor             |
| 511 | PTRH2    | 0.767 | 0.723 | 0.015 | 0.001 | NM_001015509 | peptidyl-tRNA hydrolase 2                              |
| 512 | PVRL1    | 0.563 | 0.755 | 0.003 | 0.010 | NM_203285    | .                                                      |
| 513 | PWP2     | 0.715 | 0.694 | 0.042 | 0.040 | NM_005049    | PWP2 periodic tryptophan protein homolog (yeast)       |
| 514 | RALB     | 0.784 | 0.772 | 0.002 | 0.001 | NM_002881    | v-ral simian leukemia viral oncogene homolog B         |
| 515 | RALGDS   | 0.721 | 0.849 | 0.027 | 0.332 | NM_001271776 | ral guanine nucleotide dissociation stimulator         |
| 516 | RALGPS2  | 0.502 | 0.456 | 0.016 | 0.009 | NM_001286247 | Ral GEF with PH domain and SH3 binding motif 2         |
| 517 | RAN      | 0.739 | 0.698 | 0.003 | 0.007 | NM_001300796 | RAN, member RAS oncogene family                        |

|     |          |       |       |       |       |              |                                                                                       |
|-----|----------|-------|-------|-------|-------|--------------|---------------------------------------------------------------------------------------|
| 518 | RANBP1   | 0.704 | 0.673 | 0.009 | 0.021 | NM_001278639 | RAN binding protein 1                                                                 |
| 519 | RANGRF   | 0.769 | 0.668 | 0.021 | 0.077 | NM_001177802 | RAN guanine nucleotide release factor                                                 |
| 520 | RBM3     | 0.775 | 0.718 | 0.034 | 0.008 | NM_006743    | RNA binding motif (RNP1, RRM) protein 3                                               |
| 521 | RBM38    | 0.716 | 0.736 | 0.007 | 0.024 | NM_183425    | RNA binding motif protein 38                                                          |
| 522 | RBX1     | 0.739 | 0.600 | 0.047 | 0.061 | NM_014248    | ring-box 1                                                                            |
| 523 | RDH13    | 0.679 | 0.671 | 0.008 | 0.005 | NM_138412    | retinol dehydrogenase 13 (all-trans/9-cis)                                            |
| 524 | RECQL4   | 0.680 | 0.708 | 0.044 | 0.013 | NM_004260    | RecQ like helicase 4                                                                  |
| 525 | REEP6    | 0.743 | 0.830 | 0.026 | 0.104 | NM_138393    | receptor accessory protein 6                                                          |
| 526 | RFC2     | 0.737 | 0.709 | 0.007 | 0.003 | NM_181471    | replication factor C subunit 2                                                        |
| 527 | RFNG     | 0.776 | 0.739 | 0.018 | 0.037 | NM_002917    | RFNG O-fucosylpeptide 3-beta-N-acetylglucosaminyltransferase                          |
| 528 | RHOD     | 0.700 | 0.560 | 0.037 | 0.022 | NM_001300886 | ras homolog family member D                                                           |
| 529 | RNF7     | 0.791 | 0.777 | 0.031 | 0.035 | NM_183237    | ring finger protein 7                                                                 |
| 530 | RPF2     | 0.748 | 0.729 | 0.023 | 0.021 | NM_001289111 | ribosome production factor 2 homolog                                                  |
| 531 | RPL22L1  | 0.741 | 0.669 | 0.018 | 0.057 | NM_001099645 | ribosomal protein L22 like 1                                                          |
| 532 | RPS19BP1 | 0.787 | 0.735 | 0.046 | 0.031 | NR_130151    | ribosomal protein S19 binding protein 1                                               |
| 533 | RRP36    | 0.754 | 0.735 | 0.014 | 0.000 | NM_033112    | ribosomal RNA processing 36                                                           |
| 534 | RRP7A    | 0.742 | 0.739 | 0.010 | 0.007 | NM_015703    | ribosomal RNA processing 7 homolog A                                                  |
| 535 | RRP9     | 0.746 | 0.650 | 0.019 | 0.011 | NM_004704    | ribosomal RNA processing 9, small subunit (SSU) processome component, homolog (yeast) |
| 536 | RUVBL1   | 0.719 | 0.672 | 0.029 | 0.042 | NM_003707    | RuvB like AAA ATPase 1                                                                |
| 537 | S100A10  | 0.771 | 0.686 | 0.002 | 0.061 | NM_002966    | S100 calcium binding protein A10                                                      |
| 538 | S100A11  | 0.424 | 0.351 | 0.003 | 0.003 | NM_005620    | S100 calcium binding protein A11                                                      |
| 539 | S100A13  | 0.714 | 0.623 | 0.016 | 0.034 | NM_005979    | S100 calcium binding protein A13                                                      |
| 540 | S100A14  | 0.208 | 0.107 | 0.008 | 0.006 | NM_020672    | S100 calcium binding protein A14                                                      |
| 541 | S100A16  | 0.329 | 0.291 | 0.003 | 0.004 | NM_080388    | S100 calcium binding protein A16                                                      |
| 542 | S100A2   | 0.590 | 0.480 | 0.005 | 0.014 | NM_005978    | S100 calcium binding protein A2                                                       |
| 543 | S100A4   | 0.628 | 0.569 | 0.015 | 0.020 | NM_019554    | S100 calcium binding protein A4                                                       |
| 544 | S100A5   | 0.774 | 0.581 | 0.041 | 0.011 | NM_002962    | S100 calcium binding protein A5                                                       |
| 545 | SAP30    | 0.717 | 0.734 | 0.021 | 0.013 | NM_003864    | Sin3A associated protein 30kDa                                                        |
| 546 | SAPCD2   | 0.665 | 0.669 | 0.017 | 0.016 | NM_178448    | suppressor APC domain containing 2                                                    |

|     |          |       |       |       |       |              |                                                                  |
|-----|----------|-------|-------|-------|-------|--------------|------------------------------------------------------------------|
| 547 | SCARA3   | 0.544 | 0.687 | 0.010 | 0.021 | NM_016240    | scavenger receptor class A member 3                              |
| 548 | SCARB1   | 0.752 | 0.779 | 0.010 | 0.003 | NM_001082959 | scavenger receptor class B member 1                              |
| 549 | SCD      | 0.733 | 0.834 | 0.029 | 0.085 | NM_005063    | stearoyl-CoA desaturase (delta-9-desaturase)                     |
| 550 | SDC1     | 0.699 | 0.650 | 0.044 | 0.038 | NM_001006946 | syndecan 1                                                       |
| 551 | SDC4     | 0.786 | 0.760 | 0.026 | 0.137 | NM_002999    | syndecan 4                                                       |
| 552 | SDHA     | 0.754 | 0.772 | 0.001 | 0.008 | NM_001294332 | succinate dehydrogenase complex flavoprotein subunit A           |
| 553 | SDHAF3   | 0.790 | 0.754 | 0.015 | 0.130 | NM_020186    | succinate dehydrogenase complex assembly factor 3                |
| 554 | SEC61B   | 0.788 | 0.671 | 0.033 | 0.103 | NM_006808    | Sec61 translocon beta subunit                                    |
| 555 | SEMA3B   | 0.202 | 0.232 | 0.009 | 0.009 | NM_004636    | semaphorin 3B                                                    |
| 556 | SEPW1    | 0.718 | 0.689 | 0.032 | 0.064 | NM_003009    | selenoprotein W, 1                                               |
| 557 | SERPINB1 | 0.800 | 0.710 | 0.018 | 0.021 | NM_030666    | serpin family B member 1                                         |
| 558 | SERPINB5 | 0.509 | 0.386 | 0.004 | 0.001 | NM_002639    | serpin family B member 5                                         |
| 559 | SERPINH1 | 0.748 | 0.744 | 0.001 | 0.033 | NM_001235    | serpin family H member 1                                         |
| 560 | SFN      | 0.347 | 0.325 | 0.000 | 0.000 | NM_006142    | stratifin                                                        |
| 561 | SGPP2    | 0.642 | 0.600 | 0.023 | 0.001 | NM_152386    | sphingosine-1-phosphate phosphatase 2                            |
| 562 | SH3BGRL3 | 0.562 | 0.598 | 0.000 | 0.001 | NM_031286    | SH3 domain binding glutamate rich protein like 3                 |
| 563 | SHMT2    | 0.753 | 0.771 | 0.044 | 0.044 | NM_001166356 | serine hydroxymethyltransferase 2                                |
| 564 | SIVA1    | 0.764 | 0.623 | 0.048 | 0.003 | NM_006427    | SIVA1 apoptosis inducing factor                                  |
| 565 | SKP2     | 0.738 | 0.755 | 0.033 | 0.055 | NM_001243120 | S-phase kinase-associated protein 2, E3 ubiquitin protein ligase |
| 566 | SLC16A3  | 0.730 | 0.674 | 0.014 | 0.004 | NM_001042422 | solute carrier family 16 member 3                                |
| 567 | SLC1A5   | 0.535 | 0.543 | 0.002 | 0.004 | NM_001145144 | solute carrier family 1 member 5                                 |
| 568 | SLC25A1  | 0.799 | 0.811 | 0.022 | 0.070 | NM_001287387 | solute carrier family 25 member 1                                |
| 569 | SLC25A11 | 0.706 | 0.676 | 0.012 | 0.014 | NM_001165417 | solute carrier family 25 member 11                               |
| 570 | SLC25A15 | 0.748 | 0.806 | 0.012 | 0.013 | NM_014252    | solute carrier family 25 member 15                               |
| 571 | SLC25A29 | 0.606 | 0.711 | 0.007 | 0.020 | NM_001291813 | solute carrier family 25 member 29                               |
| 572 | SLC25A33 | 0.674 | 0.642 | 0.011 | 0.007 | NM_032315    | solute carrier family 25 member 33                               |
| 573 | SLC25A37 | 0.611 | 0.726 | 0.016 | 0.022 | NM_016612    | solute carrier family 25 member 37                               |
| 574 | SLC25A39 | 0.750 | 0.812 | 0.020 | 0.083 | NM_016016    | solute carrier family 25 member 39                               |
| 575 | SLC37A4  | 0.776 | 0.746 | 0.046 | 0.063 | NM_001467    | solute carrier family 37 member 4                                |

|     |          |       |       |       |       |              |                                                       |
|-----|----------|-------|-------|-------|-------|--------------|-------------------------------------------------------|
| 576 | SLC38A5  | 0.560 | 0.449 | 0.013 | 0.003 | NM_033518    | solute carrier family 38 member 5                     |
| 577 | SLC39A4  | 0.605 | 0.559 | 0.002 | 0.014 | NM_017767    | solute carrier family 39 member 4                     |
| 578 | SLC9A3R2 | 0.762 | 0.714 | 0.020 | 0.024 | NM_004785    | SLC9A3 regulator 2                                    |
| 579 | SLMO2-AT | 0.564 | 0.806 | 0.033 | 0.271 | NR_037930    | SLMO2-ATP5E readthrough                               |
| 580 | SLPI     | 0.132 | 0.086 | 0.000 | 0.000 | NM_003064    | secretory leukocyte peptidase inhibitor               |
| 581 | SMIM7    | 0.698 | 0.704 | 0.011 | 0.010 | NM_024104    | small integral membrane protein 7                     |
| 582 | SNAPIN   | 0.737 | 0.854 | 0.014 | 0.059 | NR_052020    | SNAP associated protein                               |
| 583 | SNHG17   | 0.702 | 0.707 | 0.001 | 0.031 | NR_027241    | small nucleolar RNA host gene 17                      |
| 584 | SNORA76C | 0.026 | 0.256 | 0.014 | 0.102 | NR_002995    | .                                                     |
| 585 | SNRNP25  | 0.759 | 0.648 | 0.047 | 0.035 | NM_024571    | small nuclear ribonucleoprotein U11/U12 subunit 25    |
| 586 | SNRNP40  | 0.764 | 0.844 | 0.010 | 0.160 | NM_004814    | small nuclear ribonucleoprotein U5 subunit 40         |
| 587 | SNRNP70  | 0.739 | 0.734 | 0.024 | 0.029 | NM_003089    | small nuclear ribonucleoprotein U1 subunit 70         |
| 588 | SNRPA    | 0.795 | 0.824 | 0.018 | 0.003 | NM_004596    | small nuclear ribonucleoprotein polypeptide A         |
| 589 | SNRPB    | 0.789 | 0.727 | 0.029 | 0.027 | NM_198216    | small nuclear ribonucleoprotein polypeptides B and B1 |
| 590 | SNRPD2   | 0.740 | 0.657 | 0.011 | 0.014 | NM_004597    | small nuclear ribonucleoprotein D2 polypeptide        |
| 591 | SNRPE    | 0.721 | 0.665 | 0.030 | 0.065 | NM_003094    | small nuclear ribonucleoprotein polypeptide E         |
| 592 | SNRPG    | 0.690 | 0.595 | 0.017 | 0.038 | NM_003096    | small nuclear ribonucleoprotein polypeptide G         |
| 593 | SNTB1    | 0.687 | 0.524 | 0.001 | 0.001 | NM_021021    | syntrophin beta 1                                     |
| 594 | SNX4     | 0.764 | 0.757 | 0.016 | 0.016 | NM_003794    | sorting nexin 4                                       |
| 595 | SOX9     | 0.462 | 0.391 | 0.003 | 0.002 | NM_000346    | SRY-box 9                                             |
| 596 | SPATA33  | 0.683 | 0.774 | 0.048 | 0.061 | NM_153025    | spermatogenesis associated 33                         |
| 597 | SPATS2L  | 0.765 | 0.720 | 0.003 | 0.002 | NM_015535    | spermatogenesis associated serine rich 2 like         |
| 598 | SPRY2    | 0.601 | 0.639 | 0.005 | 0.002 | NM_005842    | sprouty RTK signaling antagonist 2                    |
| 599 | SQLE     | 0.791 | 0.844 | 0.009 | 0.166 | NM_003129    | squalene epoxidase                                    |
| 600 | SRM      | 0.757 | 0.688 | 0.015 | 0.031 | NM_003132    | spermidine synthase                                   |
| 601 | SRSF2    | 0.682 | 0.737 | 0.023 | 0.049 | NM_001195427 | serine/arginine-rich splicing factor 2                |
| 602 | SRSF3    | 0.750 | 0.723 | 0.031 | 0.042 | NR_036610    | serine/arginine-rich splicing factor 3                |
| 603 | SRSF6    | 0.779 | 0.844 | 0.011 | 0.138 | NM_006275    | serine/arginine-rich splicing factor 6                |
| 604 | SRSF7    | 0.774 | 0.769 | 0.022 | 0.012 | NM_001195446 | serine/arginine-rich splicing factor 7                |

|     |         |       |       |       |       |              |                                                                  |
|-----|---------|-------|-------|-------|-------|--------------|------------------------------------------------------------------|
| 605 | SRXN1   | 0.767 | 0.791 | 0.009 | 0.024 | NM_080725    | sulfiredoxin 1                                                   |
| 606 | SS18L2  | 0.698 | 0.593 | 0.028 | 0.074 | NM_016305    | SS18 like 2                                                      |
| 607 | SSBP4   | 0.752 | 0.714 | 0.023 | 0.019 | NM_032627    | single stranded DNA binding protein 4                            |
| 608 | SSFA2   | 0.732 | 0.728 | 0.022 | 0.020 | NM_001287505 | sperm specific antigen 2                                         |
| 609 | STAP2   | 0.461 | 0.477 | 0.014 | 0.006 | NM_001013841 | signal transducing adaptor family member 2                       |
| 610 | STEAP1  | 0.581 | 0.446 | 0.015 | 0.001 | NM_012449    | six transmembrane epithelial antigen of the prostate 1           |
| 611 | STK25   | 0.756 | 0.788 | 0.032 | 0.026 | NM_006374    | serine/threonine kinase 25                                       |
| 612 | STMN3   | 0.556 | 0.636 | 0.019 | 0.047 | NM_015894    | stathmin 3                                                       |
| 613 | STX10   | 0.798 | 0.705 | 0.000 | 0.002 | NM_003765    | syntaxin 10                                                      |
| 614 | SULT2B1 | 0.231 | 0.185 | 0.004 | 0.003 | NM_177973    | sulfotransferase family 2B member 1                              |
| 615 | SUMO3   | 0.740 | 0.672 | 0.001 | 0.000 | NM_006936    | small ubiquitin-like modifier 3                                  |
| 616 | SVIP    | 0.753 | 0.719 | 0.012 | 0.054 | NM_148893    | small VCP/p97-interacting protein                                |
| 617 | SYTL1   | 0.729 | 0.660 | 0.014 | 0.007 | NM_001193308 | synaptotagmin like 1                                             |
| 618 | TAF10   | 0.610 | 0.631 | 0.006 | 0.010 | NM_006284    | TATA-box binding protein associated factor 10                    |
| 619 | TAGLN2  | 0.698 | 0.626 | 0.013 | 0.000 | NM_003564    | transgelin 2                                                     |
| 620 | TALDO1  | 0.746 | 0.684 | 0.003 | 0.001 | NM_006755    | transaldolase 1                                                  |
| 621 | TBCC    | 0.799 | 0.775 | 0.047 | 0.026 | NM_003192    | tubulin folding cofactor C                                       |
| 622 | TCERG1  | 0.733 | 0.743 | 0.002 | 0.004 | NM_006706    | transcription elongation regulator 1                             |
| 623 | TCF7    | 0.578 | 0.621 | 0.013 | 0.019 | NM_003202    | transcription factor 7 (T-cell specific, HMG-box)                |
| 624 | TDO2    | 0.633 | 0.567 | 0.005 | 0.011 | NM_005651    | tryptophan 2,3-dioxygenase                                       |
| 625 | TELO2   | 0.654 | 0.681 | 0.048 | 0.088 | NM_016111    | telomere maintenance 2                                           |
| 626 | TERF1   | 0.767 | 0.770 | 0.017 | 0.010 | NM_017489    | telomeric repeat binding factor 1                                |
| 627 | TFAP2A  | 0.796 | 0.806 | 0.019 | 0.040 | NM_003220    | transcription factor AP-2 alpha                                  |
| 628 | TFRC    | 0.672 | 0.655 | 0.001 | 0.002 | NM_003234    | transferrin receptor                                             |
| 629 | THOC3   | 0.776 | 0.802 | 0.036 | 0.124 | NM_032361    | THO complex 3                                                    |
| 630 | TIMM10  | 0.659 | 0.655 | 0.045 | 0.006 | NM_012456    | translocase of inner mitochondrial membrane 10 homolog (yeast)   |
| 631 | TIMM17A | 0.786 | 0.721 | 0.024 | 0.019 | NM_006335    | translocase of inner mitochondrial membrane 17 homolog A (yeast) |
| 632 | TIMM8B  | 0.681 | 0.660 | 0.003 | 0.021 | NR_028383    | translocase of inner mitochondrial membrane 8 homolog B (yeast)  |
| 633 | TINAGL1 | 0.708 | 0.721 | 0.037 | 0.060 | NM_001204414 | tubulointerstitial nephritis antigen like 1                      |

|     |           |       |       |       |       |              |                                                       |
|-----|-----------|-------|-------|-------|-------|--------------|-------------------------------------------------------|
| 634 | TKT       | 0.681 | 0.671 | 0.005 | 0.024 | NM_001135055 | transketolase                                         |
| 635 | TMA7      | 0.516 | 0.415 | 0.027 | 0.028 | NM_015933    | translation machinery associated 7 homolog            |
| 636 | TMC5      | 0.749 | 0.746 | 0.020 | 0.050 | NM_001308161 | transmembrane channel like 5                          |
| 637 | TMEM11    | 0.757 | 0.688 | 0.005 | 0.003 | NR_024547    | transmembrane protein 11                              |
| 638 | TMEM132A  | 0.720 | 0.849 | 0.009 | 0.149 | NM_017870    | transmembrane protein 132A                            |
| 639 | TMEM147   | 0.717 | 0.631 | 0.009 | 0.001 | NM_032635    | transmembrane protein 147                             |
| 640 | TMEM14B   | 0.781 | 0.683 | 0.042 | 0.048 | NM_001286489 | transmembrane protein 14B                             |
| 641 | TMEM189   | 0.751 | 0.955 | 0.022 | 0.623 | NM_199129    | transmembrane protein 189                             |
| 642 | TMEM30B   | 0.705 | 0.664 | 0.024 | 0.043 | NM_001017970 | transmembrane protein 30B                             |
| 643 | TMEM52    | 0.555 | 0.543 | 0.038 | 0.003 | NM_178545    | transmembrane protein 52                              |
| 644 | TMSB10    | 0.666 | 0.538 | 0.007 | 0.023 | NM_021103    | thymosin beta 10                                      |
| 645 | TMSB4X    | 0.474 | 0.308 | 0.005 | 0.003 | NM_021109    | thymosin beta 4, X-linked                             |
| 646 | TNFRSF12A | 0.698 | 0.598 | 0.008 | 0.034 | NM_016639    | tumor necrosis factor receptor superfamily member 12A |
| 647 | TNFRSF21  | 0.721 | 0.681 | 0.016 | 0.039 | NM_014452    | tumor necrosis factor receptor superfamily member 21  |
| 648 | TOB1      | 0.787 | 0.848 | 0.011 | 0.096 | NM_001243885 | transducer of ERBB2, 1                                |
| 649 | TOMM40    | 0.744 | 0.625 | 0.049 | 0.008 | NM_001128916 | translocase of outer mitochondrial membrane 40        |
| 650 | TOMM5     | 0.642 | 0.599 | 0.001 | 0.023 | NM_001001790 | translocase of outer mitochondrial membrane 5         |
| 651 | TOMM6     | 0.747 | 0.665 | 0.018 | 0.052 | NM_001134493 | translocase of outer mitochondrial membrane 6         |
| 652 | TOR1A     | 0.791 | 0.829 | 0.017 | 0.170 | NM_000113    | torsin family 1 member A                              |
| 653 | TPBG      | 0.754 | 0.785 | 0.009 | 0.004 | NM_006670    | trophoblast glycoprotein                              |
| 654 | TRA2B     | 0.800 | 0.787 | 0.049 | 0.069 | NM_004593    | transformer 2 beta homolog (Drosophila)               |
| 655 | TRABD2A   | 0.579 | 0.662 | 0.011 | 0.021 | NM_001277053 | TraB domain containing 2A                             |
| 656 | TRAF3IP2  | 0.686 | 0.655 | 0.004 | 0.010 | NM_147686    | TRAF3 interacting protein 2                           |
| 657 | TREX1     | 0.709 | 0.786 | 0.023 | 0.047 | NM_007248    | three prime repair exonuclease 1                      |
| 658 | TRIP13    | 0.780 | 0.780 | 0.012 | 0.015 | NM_001166260 | thyroid hormone receptor interactor 13                |
| 659 | TSC22D1   | 0.784 | 0.744 | 0.041 | 0.043 | NM_001243799 | TSC22 domain family member 1                          |
| 660 | TSEN54    | 0.747 | 0.666 | 0.044 | 0.024 | NM_207346    | tRNA splicing endonuclease subunit 54                 |
| 661 | TSKU      | 0.678 | 0.607 | 0.049 | 0.004 | NM_001258210 | tsukushi, small leucine rich proteoglycan             |
| 662 | TSPAN15   | 0.581 | 0.522 | 0.000 | 0.001 | NM_012339    | tetraspanin 15                                        |

|     |         |       |       |       |       |              |                                                                           |
|-----|---------|-------|-------|-------|-------|--------------|---------------------------------------------------------------------------|
| 663 | TSTA3   | 0.793 | 0.688 | 0.036 | 0.032 | NM_003313    | tissue specific transplantation antigen P35B                              |
| 664 | TTC22   | 0.798 | 0.822 | 0.031 | 0.099 | NM_001114108 | tetratricopeptide repeat domain 22                                        |
| 665 | TUBA1B  | 0.771 | 0.749 | 0.008 | 0.014 | NM_006082    | tubulin alpha 1b                                                          |
| 666 | TUBA1C  | 0.771 | 0.767 | 0.038 | 0.005 | NM_001303114 | tubulin alpha 1c                                                          |
| 667 | TUBB2A  | 0.499 | 0.528 | 0.007 | 0.008 | NM_001310315 | tubulin beta 2A class IIa                                                 |
| 668 | TUBB3   | 0.372 | 0.388 | 0.001 | 0.002 | NM_001197181 | tubulin beta 3 class III                                                  |
| 669 | TUBB4B  | 0.650 | 0.648 | 0.010 | 0.009 | NM_006088    | tubulin beta 4B class IVb                                                 |
| 670 | TUBG1   | 0.699 | 0.720 | 0.010 | 0.022 | NM_001070    | tubulin gamma 1                                                           |
| 671 | TUSC2   | 0.708 | 0.665 | 0.023 | 0.023 | NM_007275    | tumor suppressor candidate 2                                              |
| 672 | TXN     | 0.580 | 0.467 | 0.011 | 0.014 | NM_001244938 | thioredoxin                                                               |
| 673 | TYMS    | 0.656 | 0.606 | 0.029 | 0.020 | NM_001071    | thymidylate synthetase                                                    |
| 674 | UBE2G2  | 0.769 | 0.788 | 0.039 | 0.029 | NM_182688    | ubiquitin conjugating enzyme E2 G2                                        |
| 675 | UBE2J2  | 0.784 | 0.796 | 0.041 | 0.032 | NM_194315    | ubiquitin conjugating enzyme E2 J2                                        |
| 676 | UBE2S   | 0.745 | 0.677 | 0.024 | 0.000 | NM_014501    | ubiquitin conjugating enzyme E2 S                                         |
| 677 | UBE2T   | 0.773 | 0.738 | 0.016 | 0.125 | NM_014176    | ubiquitin conjugating enzyme E2 T                                         |
| 678 | UBIAD1  | 0.754 | 0.776 | 0.007 | 0.015 | NM_013319    | UbiA prenyltransferase domain containing 1                                |
| 679 | UNC5B   | 0.297 | 0.343 | 0.012 | 0.013 | NM_001244889 | unc-5 netrin receptor B                                                   |
| 680 | UQCC2   | 0.670 | 0.644 | 0.000 | 0.018 | NM_032340    | ubiquinol-cytochrome c reductase complex assembly factor 2                |
| 681 | UQCRFS1 | 0.767 | 0.708 | 0.006 | 0.013 | NM_006003    | ubiquinol-cytochrome c reductase, Rieske iron-sulfur polypeptide 1        |
| 682 | UQCRCQ  | 0.692 | 0.627 | 0.038 | 0.045 | NM_014402    | ubiquinol-cytochrome c reductase complex III subunit VII                  |
| 683 | USMG5   | 0.714 | 0.560 | 0.014 | 0.046 | NM_032747    | up-regulated during skeletal muscle growth 5 homolog (mouse)              |
| 684 | USP6NL  | 0.616 | 0.532 | 0.007 | 0.004 | NM_014688    | USP6 N-terminal like                                                      |
| 685 | UTP3    | 0.777 | 0.703 | 0.028 | 0.083 | NM_020368    | UTP3, small subunit processome component homolog ( <i>S. cerevisiae</i> ) |
| 686 | UTP6    | 0.754 | 0.763 | 0.042 | 0.040 | NM_018428    | UTP6, small subunit processome component                                  |
| 687 | UXS1    | 0.755 | 0.742 | 0.029 | 0.136 | NM_025076    | UDP-glucuronate decarboxylase 1                                           |
| 688 | VARS2   | 0.580 | 0.599 | 0.008 | 0.010 | NM_001167733 | valyl-tRNA synthetase 2, mitochondrial                                    |
| 689 | VASP    | 0.628 | 0.599 | 0.002 | 0.000 | NM_003370    | vasodilator-stimulated phosphoprotein                                     |
| 690 | VPS37B  | 0.759 | 0.799 | 0.042 | 0.027 | NM_024667    | VPS37B, ESCRT-I subunit                                                   |
| 691 | VSNL1   | 0.577 | 0.463 | 0.007 | 0.003 | NM_003385    | visinin-like 1                                                            |



|     |           |       |       |       |       |              |                                                                             |
|-----|-----------|-------|-------|-------|-------|--------------|-----------------------------------------------------------------------------|
| 692 | WDR1      | 0.800 | 0.795 | 0.020 | 0.024 | NM_005112    | WD repeat domain 1                                                          |
| 693 | WDR18     | 0.742 | 0.685 | 0.032 | 0.009 | NM_024100    | WD repeat domain 18                                                         |
| 694 | WDR34     | 0.754 | 0.715 | 0.049 | 0.028 | NM_052844    | WD repeat domain 34                                                         |
| 695 | WDR5      | 0.754 | 0.778 | 0.041 | 0.075 | NM_017588    | WD repeat domain 5                                                          |
| 696 | WIBG      | 0.729 | 0.637 | 0.006 | 0.000 | NM_032345    | .                                                                           |
| 697 | WRAP73    | 0.682 | 0.809 | 0.012 | 0.028 | NM_017818    | WD repeat containing, antisense to TP73                                     |
| 698 | YBX1      | 0.785 | 0.711 | 0.003 | 0.003 | NM_004559    | Y-box binding protein 1                                                     |
| 699 | YRDC      | 0.775 | 0.762 | 0.029 | 0.008 | NM_024640    | yrnC N6-threonylcarbamoyltransferase domain containing                      |
| 700 | YWHAZ     | 0.655 | 0.639 | 0.003 | 0.003 | NM_001135702 | tyrosine 3-monooxygenase/tryptophan 5-monooxygenase activation protein zeta |
| 701 | ZBED5-AS1 | 0.736 | 0.780 | 0.001 | 0.281 | NR_034137    | ZBED5 antisense RNA 1                                                       |
| 702 | ZBTB7C    | 0.280 | 0.255 | 0.006 | 0.006 | NM_001039360 | zinc finger and BTB domain containing 7C                                    |
| 703 | ZDHHC18   | 0.772 | 0.778 | 0.021 | 0.007 | NM_032283    | zinc finger DHHC-type containing 18                                         |
| 704 | ZIC2      | 0.591 | 0.623 | 0.013 | 0.019 | NM_007129    | Zic family member 2                                                         |
| 705 | ZMYND19   | 0.650 | 0.647 | 0.040 | 0.057 | NM_138462    | zinc finger MYND-type containing 19                                         |
| 706 | ZNF385A   | 0.475 | 0.535 | 0.001 | 0.011 | NM_015481    | zinc finger protein 385A                                                    |
| 707 | ZNF511    | 0.748 | 0.662 | 0.013 | 0.008 | NR_130127    | zinc finger protein 511                                                     |
| 708 | ZNF593    | 0.603 | 0.617 | 0.016 | 0.010 | NM_015871    | zinc finger protein 593                                                     |
| 709 | ZNF703    | 0.666 | 0.683 | 0.027 | 0.031 | NM_025069    | zinc finger protein 703                                                     |
| 710 | ZNF706    | 0.679 | 0.722 | 0.017 | 0.022 | NM_016096    | zinc finger protein 706                                                     |
| 711 | ZNRF3     | 0.776 | 0.780 | 0.003 | 0.002 | NM_001206998 | zinc and ring finger 3                                                      |
| 712 | ZP3       | 0.754 | 0.801 | 0.024 | 0.217 | NM_007155    | zona pellucida glycoprotein 3 (sperm receptor)                              |
| 713 | ZYX       | 0.769 | 0.834 | 0.031 | 0.170 | NM_003461    | zyxin                                                                       |
